1 **End-of-life targeted auxin-mediated degradation of DAF-2 Insulin/IGF-1 receptor**  
2 **promotes longevity free from growth-related pathologies**

3

4 Richard Venz <sup>1§</sup>, Tina Pekec <sup>2,3</sup>, Iskra Katic <sup>3</sup>, Rafal Ciosk <sup>3,4,5</sup>, and Collin Y. Ewald <sup>1\*</sup>

5

6 **1** Eidgenössische Technische Hochschule Zürich, Department of Health Sciences and  
7 Technology, Institute of Translational Medicine, Schwerzenbach-Zürich CH-8603,  
8 Switzerland

9 **2** University of Basel, Faculty of Natural Sciences, Klingelbergstrasse 70, 3026 Basel,  
10 Switzerland

11 **3** Friedrich Miescher Institute for Biomedical Research, Maulbeerstrasse 66, 4058  
12 Basel, Switzerland

13 **4** Institute of Bioorganic Chemistry, Polish Academy of Sciences, Noskowskiego 12/14,  
14 61-704 Poznań, Poland

15 **5** University of Oslo, Department of Biosciences, Blindernveien 31, 0371 Oslo,  
16 Norway  
17

18 \*Corresponding authors: [collin-ewald@ethz.ch](mailto:collin-ewald@ethz.ch) (CYE)

19

20 **Keywords:** Insulin, IGF-1, *daf-2*, *daf-16*, *skn-1*, starvation, diet, auxin-induced  
21 degradation, neuron, aging, stress, healthspan, dauer

22

23

24 **Abstract**

25 Preferably, lifespan-extending therapies should work when applied late in life without  
26 causing undesired pathologies. However, identifying lifespan-extending interventions  
27 that are effective late in life and which avoid undesired secondary pathologies remains  
28 elusive. Reducing Insulin/IGF-1 signaling (IIS) increases lifespan across species, but  
29 the effects of reduced IIS interventions in extreme geriatric ages remains unknown.  
30 Using the nematode *C. elegans*, we engineered the conditional depletion of the DAF-  
31 2/insulin/IGF-1 transmembrane receptor using an auxin-inducible degradation (AID)  
32 system that allows for the temporal and spatial reduction in DAF-2 protein levels at  
33 time points after which interventions such as RNAi may lose efficacy. Using this  
34 system, we found that AID-mediated depletion of DAF-2 protein efficiently extends  
35 animal lifespan. Depletion of DAF-2 during early adulthood resulted in multiple adverse  
36 phenotypes, including growth retardation, germline shrinkage, egg-retention, and  
37 reducing offspring. By contrast, however, AID-mediated depletion of DAF-2 specifically  
38 in the intestine resulted in an extension of lifespan without these deleterious effects.  
39 Importantly, AID-mediated depletion of DAF-2 protein in animals past their median  
40 lifespan allowed for an extension of lifespan without affecting growth or behavioral  
41 capacity. Thus, both late-in-life targeting and tissue-specific targeting of IIS minimize  
42 the deleterious effects typically seen with interventions that reduced IIS, suggesting  
43 potential therapeutic methods by which longevity and healthspan can be increased in  
44 even geriatric populations.

45

## 46 **Introduction**

47 The goal of aging research or geroscience is to identify interventions that promote  
48 health during old age (B. K. Kennedy et al., 2014; López-Otín et al., 2013; Partridge et  
49 al., 2018). Nutrient-sensing pathways that regulate growth and stress resistance play  
50 major roles as conserved assurance pathways for healthy aging (Kenyon, 2010; Liu et  
51 al., 2020; López-Otín et al., 2013; Partridge et al., 2018). One of the first longevity  
52 pathways discovered was the insulin/insulin-like growth factor (IGF)-1 signaling  
53 pathway (reviewed in (Kenyon, 2010)). Reducing insulin/IGF-1 signaling (IIS)  
54 increases lifespan across species (Kenyon, 2010). Mice heterozygous for the IGF-1  
55 receptor, or with depleted insulin receptor in adipose tissue, are stress-resistant and  
56 long-lived (Blüher et al., 2003; Holzenberger et al., 2003), for example, and several  
57 single-nucleotide polymorphisms in the IIS pathway have been associated with human  
58 longevity (Kenyon, 2010). Moreover, gene variants in the IGF-1 receptor have been  
59 associated and functionally linked with long lifespans in human centenarians (Suh et  
60 al., 2008). This suggests that a comprehensive understanding of this pathway in  
61 experimental, genetically-tractable organisms has promising translational value for  
62 promoting health in elderly humans. However, whether or not reducing insulin/IGF-1  
63 signaling during end-of-life stages can still promote health and longevity in any  
64 organism is unknown. Therefore, we turned to the model organism *Caenorhabditis*  
65 *elegans* to investigate whether reducing IIS during old age was sufficient to increase  
66 lifespan.

67

68 The groundbreaking discovery that a single mutation in *daf-2*, which is the orthologue  
69 of both the insulin and IGF-1 receptors (Kimura et al., 1997), or mutations in  
70 “downstream” genes in the insulin/IGF-1 signaling pathway, could double the lifespan

71 of an organism was made in the nematode *C. elegans* (Friedman and Johnson, 1988;  
72 Kenyon et al., 1993). Since its discovery, over 1000 papers on *daf-2* have been  
73 published, making it one of the most studied genes in this model organism (Source:  
74 PubMed). Genetic and -omics approaches have revealed that the DAF-2 insulin/IGF-  
75 1 receptor signaling regulates growth, development, metabolism, inter-tissue signaling,  
76 immunity, stress defense, and protein homeostasis, including extracellular matrix  
77 remodeling (Ewald et al., 2015; Gems et al., 1998; Kimura et al., 1997; Murphy, 2013;  
78 Wolkow et al., 2000). Much of our knowledge of the effects of *daf-2* on aging has come  
79 from the study of reduction-of-function alleles of *daf-2*. Several alleles of *daf-2* have  
80 been isolated that are temperature-sensitive with respect to an alternative  
81 developmental trajectory. For instance, most *daf-2* mutants develop into adults at 15°C  
82 and 20°C but enter the dauer stage at 25°C (Gems et al., 1998), a facultative and  
83 alternative larval endurance stage in which *C. elegans* spends most of its life cycle in  
84 the wild (Hu, 2007). Under favorable conditions, *C. elegans* develops through four  
85 larval stages (L1-L4). By contrast, when the animals are deprived of food, experience  
86 thermal stress (above 27°C), or overcrowded environments, the developing larvae molt  
87 into an alternative pre-dauer (L2d) stage. If conditions do not improve, *C. elegans* enter  
88 the dauer diapause instead of the L3 stage (Hu, 2007; Karp, 2018).

89  
90 A major limitation in using *daf-2* mutants is that all of them go through this alternative  
91 pre-dauer stage (L2d), irrespective of temperature or whether they later enter the dauer  
92 stage or not (Karp, 2018; Ruaud et al., 2011). This suggests a physiological  
93 reprogramming occurs in these mutants that might spill over to affect physiology in  
94 adulthood. Indeed, the *daf-2* alleles have been categorized into two mutant classes  
95 depending on the penetrance of dauer-associated phenotypes during adulthood and

96 aging, such as reduced brood size, small body size, and germline shrinkage<sup>12,15,19-23</sup>.  
97 To overcome this, RNA interference of *daf-2* can be applied, which increases lifespan  
98 without dauer formation during development and circumvents induction of dauer-  
99 associated phenotypes during adulthood (Dillin et al., 2002; Ewald et al., 2015; 2018;  
100 S. Kennedy et al., 2004). However, the increase in lifespan by RNAi of *daf-2* is only  
101 partial compared to strong alleles such as *daf-2(e1370)* (Ewald et al., 2015).  
102 Furthermore, adult-specific RNAi knockdown of *daf-2* quickly loses its potential to  
103 increase lifespan and does not extend lifespan when started after day 6 of adulthood  
104 (Dillin et al., 2002), after the reproductive period of *C. elegans*. Whether this is due to  
105 age-related functional decline of RNAi machinery or residual DAF-2 protein levels -- or  
106 whether the late-life depletion of *daf-2* simply does not extend lifespan -- remains  
107 unclear. As such, use of an alternative method to reduce DAF-2 levels, beyond RNAi  
108 or *daf-2* mutation may allow us to more clearly uncouple the pleiotropic effects of  
109 reduced IIS during development from those that drive *daf-2*-mediated longevity during  
110 late adulthood.

111  
112 To this end, we used an auxin-inducible degradation (AID) system to induce the  
113 depletion of the degron-tagged DAF-2 protein with temporal precision (Zhang et al.,  
114 2015). The *Arabidopsis thaliana* IAA17 degron is a 68-amino acid motif that is  
115 specifically recognized by the transport inhibitor response 1 (TIR1) protein only in the  
116 presence of the plant hormone auxin (indole-3-acetic acid) (Dharmasiri et al., 2005).  
117 Although cytoplasmic, nuclear, and membrane-binding domain proteins tagged with  
118 degron have been recently shown to be targeted and degraded in *C. elegans* (Beer et  
119 al., 2019; Zhang et al., 2015), to our knowledge, the AID system has not been used  
120 previously to degrade transmembrane proteins, such as the DAF-2 insulin/IGF-1

121 receptor. We find that using AID effectively degrades DAF-2 protein and promotes  
122 dauer formation when applied early in development. Dauer-associated phenotypes are  
123 present in adults when AID of DAF-2 is applied late in development. Some of these  
124 adulthood dauer-traits are induced by the loss of *daf-2* in neurons, but others seem to  
125 be caused by the systemic loss of *daf-2*. More importantly, the post-developmental,  
126 conditional degradation of DAF-2 protein extends lifespan without introducing dauer-  
127 like phenotypes. Remarkably, we demonstrate that when half of the population has  
128 died at day 25 of adulthood, AID of DAF-2 in these remaining and aged animals is  
129 sufficient to promote longevity. Our work suggests that therapeutics applied at even  
130 extremely late stages of life are capable of increasing longevity and healthspan in  
131 animals.

132

## 133 **Results**

### 134 **Generation and validation of a degron-tagged DAF-2 receptor**

135 To monitor and conditionally regulate protein levels of the *C. elegans* DAF-2  
136 insulin/IGF-1 receptor, we introduced a degron::3xFLAG tag into the 3' end of the *daf-*  
137 *2* open reading frame (Supplementary Figure 1A). This degron::3xFLAG insertion into  
138 the genome was designed to tag the DAF-2 receptor at the cytosolic part for two  
139 reasons: first, to minimize any interference by the 81-amino acids large  
140 degron::3xFLAG-tag with the DAF-2 receptor function; and second, to ensure  
141 accessibility of the degron for targeted degradation by the TIR1 ubiquitin ligase  
142 expressed in the cytoplasm (Figure 1A). Using CRISPR, we endogenously tagged the  
143 DAF-2 receptor and the resulting *daf-2(bch40)* CRISPR allele was verified by PCR  
144 (Supplementary Figure 1B). We performed western blot analysis against the 3xFLAG-  
145 tag and detected a specific band in *daf-2(bch40)* animals. This band was absent in wild

146 type (N2) and animals carrying only the *eft-3p::TIR1::mRuby::unc-54* 3'UTR transgene,  
147 which expresses TIR1 in all somatic cells (Figure 1B). To promote degradation of the  
148 degron::3xFLAG-tagged DAF-2 receptor, we crossed *daf-2(bch40)* into TIR1-  
149 expressing *C. elegans* (Figure 1A). The strain obtained from this cross will be called  
150 „DAF-2::degron“ throughout this paper (*ieSi57* [*Peft-3::TIR1::mRuby::unc-54* 3'UTR +  
151 *Cbr-unc-119(+)*] II; *daf-2(bch40)* [degron::3xFLAG::STOP::SL2-SV40-  
152 degron::wrmScarlet-*egl-13* NLS]) III.). This strain showed no obvious phenotypes and  
153 exhibited a normal developmental progression at 20°C (Supplementary Figures 1C,  
154 1D). To verify whether the band from the western blot was indeed DAF-  
155 2::degron::3xFLAG, we treated DAF-2::degron animals with *daf-2* RNAi. The band  
156 nearly completely disappeared after 48 hours of *daf-2(RNAi)* feeding (Figure 1C, Data  
157 Source Files 1, 2). Collectively, these results suggested that the tagged  
158 transmembrane receptor DAF-2 did not interfere with normal DAF-2 function.

159

## 160 **Dietary changes modulate endogenous DAF-2/Insulin/IGF-1 receptor abundance**

161 Next, we monitored endogenous DAF-2 protein levels under different environmental  
162 conditions, such as temperature and diet. Previously, Kimura and colleagues used  
163 DAF-2 antibody immunostaining of whole animals and reported that mutant DAF-  
164 2(*e1370*) protein is present at 15°C but barely detected at 25°C, whereas mutant DAF-  
165 2(*e1370*) protein in a *daf-16* null background or wild-type DAF-2 protein persists at  
166 both 15°C and 25°C (Kimura and Riddle, 2011). By contrast, upon 24 hours of  
167 starvation, the DAF-2 receptor is no longer detectable by using immunofluorescence  
168 in fixed *C. elegans* (Kimura and Riddle, 2011). Since the FOXO transcription factor  
169 *daf-16* is the transcriptional output of *daf-2* signaling (Ewald et al., 2018; Gems et al.,  
170 1998), these results suggest that DAF-2 protein levels may be autoregulated by

171 insulin/IGF-1 signaling and might be influenced by temperature and food availability.  
172 We first asked whether our DAF-2::degron::3xFLAG tag allows quantification of  
173 endogenous DAF-2 levels. We observed comparable wild-type DAF-  
174 2::degron::3xFLAG levels across temperatures (15-28°C; Figure 1E), indicating that  
175 temperature does not influence DAF-2 levels in wild type. Intriguingly, however, we  
176 found that using FLAG-HRP antibodies to monitor protein levels, levels of DAF-2  
177 protein almost completely disappeared after 36 to 48 hours of starvation (Figures 1F,  
178 1G). In keeping with this result, well-fed animals, for which we added 1% glucose into  
179 the bacterial diet (OP50), increased the DAF-2 protein levels (Figures 1F, 1G). These  
180 effects were also influenced by the specific strain of *E. coli* used in each experiment:  
181 when *C. elegans* were fed HT1115 (L4440), DAF-2 levels did not decrease after 24 or  
182 48 hours of starvation, suggesting that the nutritional composition of the animal's diet  
183 prior to starvation influences DAF-2 stability (Figure 1H). Therefore, we conclude that  
184 different food sources and dietary cues control not only the secretion of insulin-like  
185 peptides to regulate DAF-2 activity (Pierce et al., 2001), but also DAF-2 receptor  
186 abundance directly.

187

### 188 **Auxin-induced degradation of degron-tagged Insulin/IGF-1 receptor**

189 In *C. elegans*, cytosolic degron-tagged proteins are almost completely degraded after  
190 30 minutes of auxin treatment (Zhang et al., 2015). However, the degradation of  
191 transmembrane proteins using AID *in vivo* has not been previously reported. We  
192 hypothesized that *C. elegans* might exhibit similar kinetics of degradation of a  
193 transmembrane protein following auxin treatment. In keeping with that hypothesis, after  
194 30 minutes of 1 mM auxin treatment, we observed a dramatic decrease in  
195 transmembrane DAF-2 protein abundance (Figures 1I, 1J). Levels of DAF-2 were only



196 slightly further reduced by continued auxin treatment, as indicated at 4 h and 24 h time  
197 points (Figures 1I, 1J). After 24 hours of 1 mM auxin treatment, we observed only a  
198 40% total decrease in DAF-2 protein abundance, rather than a complete loss (Figures  
199 1C, 1D). Similar kinetics in the degradation of DAF-2::degron::3xFLAG levels were  
200 confirmed using additional FLAG and degron antibodies (DataSource File 2). Taken  
201 together, these results suggest that our AID system allows for the partial, rapid  
202 degradation of the transmembrane DAF-2 receptor.

203

### 204 **Inactivation of DAF-2::degron by the AID inhibits downstream insulin/IGF-1** 205 **signaling**

206 We wondered whether the reduction of DAF-2 levels seen with AID would result in  
207 reduced insulin/IGF-1 signaling that would have any physiological and functional  
208 consequences. Activation of DAF-2/insulin/IGF-1 receptor induces a downstream  
209 kinase cascade to phosphorylate the transcription factors DAF-16/FOXO and SKN-  
210 1/NRF, causing their retention in the cytoplasm (Figure 2A) (Ewald et al., 2015;  
211 Henderson and Johnson, 2001; Lin et al., 2001; Murphy, 2013; Ogg et al., 1997; Tullet  
212 et al., 2008). Genetic inhibition of *daf-2* results in less DAF-16 and SKN-1  
213 phosphorylation and promotes nuclear translocation to induce the expression of target  
214 genes, such as *sod-3* (superoxide dismutase) and *gst-4* (glutathione S-transferase),  
215 respectively (Ewald et al., 2015; Henderson and Johnson, 2001; Lin et al., 2001;  
216 Murphy, 2013; Tullet et al., 2008). We found within 1 hour of 1 mM auxin treatment,  
217 most DAF-16::GFP translocated into the nuclei in DAF-2::degron animals (Figure 2B),  
218 with observable translocation already after 30 minutes (Supplementary Figure 2A).  
219 This DAF-16::GFP nuclear localization in DAF-2::degron animals was time- and auxin-  
220 concentration dependent and did not occur in DAF-16::GFP animals with wild-type

221 DAF-2 (Figure 2B, Supplementary Figure 2B). Similarly, SKN-1- or DAF-16-target  
222 gene expression of *gst-4* or *sod-3* was only induced upon auxin treatment in DAF-  
223 2::degron animals (Figures 2C, 2D). Thus, insulin/IGF-1 signaling is reduced upon AID  
224 DAF-2 degradation.

225

## 226 **AID of DAF-2::degron promotes dauer entry at any temperature**

227 Reduced insulin/IGF-1 signaling during development promotes dauer entry. Dauer  
228 formation at 15°C has been observed for a variety of strong loss-of-function alleles,  
229 such as the class I alleles *e1369* and *m212*, the class II allele *e979*, the null alleles  
230 *m65*, *m646*, *m633*, and a variety of unclassified alleles discovered by Malone and  
231 Thomas (Gems et al., 1998; Kimura and Riddle, 2011; Malone and Thomas, 1994;  
232 Patel et al., 2008). For the commonly used reference alleles *e1368* and *e1370*,  
233 penetrant dauer formation only occurs at 25°C (Gems et al., 1998). By contrast,  
234 knockdown of *daf-2* by RNAi does not cause dauer formation at any temperature  
235 <sup>15,24,25</sup>. We hypothesized that dauer formation would not happen because the decrease  
236 of DAF-2::degron levels after auxin treatment is only around 40%. To our surprise,  
237 synchronized L1 treated with 0.1 mM or 1 mM leads to dauer formation of all larvae at  
238 25°C (Figures 2E, 2F). We observed a dose-dependent retardation of the  
239 developmental speed when using lower concentrations (1, 10, and 50 μM), but their  
240 offspring on plates containing auxin entered dauer (Figures 2E, 2F). The dependence  
241 on auxin concentration on dauer formation in L1 animals suggests an all-or-nothing  
242 threshold of DAF-2 receptor levels for the decision or commitment to dauer diapause.  
243 Even more surprising was that dauer formation was also observed at 15°C and 20°C  
244 with complete penetrance (Figures 2G, 2H). We found that dauer formation was  
245 temporally related to developmental speed at a given temperature: At 15°C, it took six

246 days; at 20°C, it took four days; and at 25°C, it took three days to form dauers (Figure  
247 2H). We verified that all auxin-induced DAF-2::degron dauers showed dauer-specific  
248 characteristics, such as SDS resistance, cessation of feeding, constricted pharynxes,  
249 and dauer-specific alae (Figure 2H, Supplementary Figures 2C-E), suggesting a  
250 complete dauer remodeling and transformation. Thus, AID of DAF-2 promotes  
251 complete dauer formation in a mechanism that is independent of temperature, but is  
252 dependent on DAF-2 protein abundance.

253

### 254 **Dauer commitment at mid-larval stage one upon DAF-2 degradation**

255 Wild-type animals enter the pre-dauer L2d stage, where they keep monitoring their  
256 environment before completely committing to dauer formation (Hu, 2007; Karp, 2018).  
257 However, previous temperature-shifting experiments (from 15°C to 25°C) with *daf-2*  
258 mutants suggested a dauer decision time-window from L1 to L2 stage before the L2d  
259 stage (Swanson and Riddle, 1981). The AID allows for precise temporal degradation  
260 of DAF-2. We pinpointed the dauer entry decision to mid-L1 by shifting synchronized  
261 L1 at different time points to plates containing 1 mM auxin and by counting the number  
262 of germ cell precursors to determine the exact age of the population at the time point  
263 when roughly 50% of the population committed to dauer stage (Supplementary Figures  
264 3A-C). We found that when DAF-2 levels are below a given threshold at mid-L1 stage,  
265 the animals commit to dauer formation irrespective of the environment during L2d or  
266 later stages.

267

### 268 **Auxin-induced degradation of DAF-2 resembles a non-conditional and severe** 269 **loss-of-function allele**

270 The FOXO transcription factor DAF-16 is required for dauer formation in *daf-2* mutants.  
271 We crossed DAF-2::degron with DAF-16::degron (Hobert, 2019) and found that *daf-16*  
272 was required for dauer formation and developmental speed alterations after DAF-  
273 2::degron depletion (Supplementary Figure 3D). Previously reports suggest that many  
274 *daf-2* alleles show low to severe penetrance of embryonic lethality and L1 arrest at  
275 higher temperatures (Collins et al., 2008; Ewald et al., 2016; Gems et al., 1998; Patel  
276 et al., 2008). Although the constitutive dauer formation of the proposed null allele *daf-*  
277 *2(m65)* is suppressed by *daf-16* null mutations, the embryonic lethality and L1 arrest  
278 are *not daf-16* dependent (Patel et al., 2008). Surprisingly, we observed no embryonic  
279 lethality or L1 arrest in the progeny of animals placed animals on 1 mM auxin as L4s.  
280 Similar results were seen using either the DAF-2::degron or DAF-2::degron; germline  
281 TIR1 strains. Taken together, these results suggest that, although there is still DAF-  
282 2::degron::3xFLAG detected with the FLAG-HRP antibody after 24 hours of auxin  
283 treatment, the persistent pool of DAF-2 receptor is insufficient to provide the wild-type  
284 functions. Higher concentrations of auxin treatment lead to toxicity in both wild type  
285 and DAF-2::degron animals (Supplementary Figure 3E). Inactivation of DAF-2 by the  
286 AID is 100% penetrant for dauer formation at any temperature. Still, the absence of  
287 embryonic lethality or L1 arrest at 1 mM auxin suggests that DAF-2::degron functionally  
288 is more similar to a non-conditional and severe loss-of-function mutation than a null  
289 allele.

290

### 291 **Enhanced lifespan extension by AID of DAF-2 in adult animals**

292 Given the strong phenotypic effects of DAF-2 AID on animal development, we next  
293 explored whether DAF-2 degradation by AID could affect the function of adult animals.  
294 Previous studies indicate that reducing IIS either by *daf-2* RNAi knockdown or in

295 genetic mutants increases lifespan at any temperature (15-25°C) (Ewald et al., 2018;  
296 2015; Gems et al., 1998). We hypothesized that AID-dependent degradation of DAF-  
297 2 would have similar effects on the lifespan of animals. We found that auxin  
298 supplementation of DAF-2::degron animals, starting from L4, resulted in a 70-135%  
299 lifespan extension (Figure 3A; Supplementary Table 1). DAF-2 degradation using 1  
300 mM auxin surpassed the longevity of commonly used *daf-2(e1368)* and *daf-2(e1370)*  
301 mutants (Figure 3A, Supplementary Table 1). By contrast, auxin-treatment at 0.1 mM  
302 or 1 mM concentration had little or no effect on wild-type lifespan (Figure 3A;  
303 Supplementary Table 1). These results suggest that auxin-induced degradation of *daf-*  
304 *2* is a powerful tool to promote longevity.

305

### 306 **Manifestation of some dauer-associated phenotypes during adulthood at 15°C** 307 **without passing through L2D**

308 Although reducing *daf-2* function causes beneficial increases in longevity and stress  
309 resistance, it causes residual detrimental phenotypes in adult animals that resemble  
310 the behavioral and morphologic changes expected in a dauer state (Ewald et al., 2018;  
311 Gems et al., 1998). In class II *daf-2* alleles, dauer-associated phenotypes, such as  
312 small gonads, reduced brood size, reduced motility, and reduced brood size, manifest  
313 only at 25°C during adulthood, but not at lower temperatures (Ewald et al., 2018; Gems  
314 et al., 1998). To determine whether DAF-2::degron AID animals display dauer-  
315 associated phenotypes, we quantified these dauer-like characteristics at 15°C and  
316 25°C. In placing L4 DAF-2::degron animals on auxin and at 25°C, we observed similar  
317 levels of egg retention and effects on gonad size as was seen in the *daf-2(e1370)* class  
318 II allele. Strikingly, these effects were temperature-dependent, as DAF-2::degron  
319 animals did not retain eggs or have reduced gonad sizes at 15°C (Figure 3B,

320 Supplementary Figure 4A). Similarly, DAF-2::degron animals on auxin exhibited  
321 germline shrinkage at 25°C, albeit to a lesser degree than the *daf-2(e1370)* class II  
322 allele (Figure 3C, Supplementary Figure 4B). This phenotype was also absent at 15°C,  
323 suggesting that egg retention and germline-shrinkage reminiscent of dauer-associated  
324 remodeling phenotypes are temperature-sensitive traits.

325  
326 Another known dauer-associated phenotype at 25°C is the quiescence or immobility  
327 of class II *daf-2(e1370)* mutants (Ewald et al., 2015; Gems et al., 1998). We did not  
328 observe any immobility of auxin-treated DAF-2::degron animals at 25°C or during  
329 lifespan assays at 20°C (Supplementary Video 1, Supplementary Table 2). Although  
330 the effects on body size of *daf-2(e1370)* class II allele are temperature dependent,  
331 presenting at 25°C but not at 15°C (Ewald et al., 2015; Gems et al., 1998; McCulloch  
332 and Gems, 2003) (Supplementary Figure 4C), auxin-induced degradation of DAF-2  
333 starting from L4 shortened body size of 2-days-old adults at both temperatures (Figure  
334 3D, Supplementary Figure 4D). Similarly, while *daf-2(e1370)* mutants only exhibit  
335 reduced brood sizes at higher temperatures (Ewald et al., 2015; Gems et al., 1998);  
336 AID of DAF-2::degron starting from L4 reduced brood size at both 15°C and 25°C  
337 (Figure 3E). This suggests that lower body and brood size manifest as non-conditional  
338 traits, in keeping with insulin/IGF-1's role as an essential gene for these functions. In  
339 summary, these results suggest that some dauer-associated phenotypes or  
340 pathologies can be induced during adulthood independent of temperature and that  
341 passing through L2d is not required for dauer-associated phenotypes in adult animals.

342

343 **Tissue-specific DAF-2 degradation reveals neuronal regulation of egg retention**  
344 **and germline remodeling**

345 The pleiotropic effects of DAF-2 have been ascribed to tissue-specific effects of DAF-  
346 2 function. DAF-2 protein levels are predominantly found in the nervous system and  
347 intestine, and to a lesser extent in the hypodermis (Kimura and Riddle, 2011), while  
348 *daf-2* mRNA expression has also been detected in the germline (Han et al., 2017;  
349 Lopez et al., 2013). Importantly, dauer formation in *daf-2(e1370)* can be restored by  
350 expressing wild-type DAF-2 only in neurons (Wolkow et al., 2000). We hypothesized  
351 that select tissues might drive these dauer-associated phenotypes. To test this, we  
352 expressed TIR1 specifically in muscles, neurons, and intestine driven by the *myo-3*,  
353 *rab-3*, and *vha-6* promoters, respectively (Materials and Methods, Supplementary  
354 Table 2). TIR1 expressed from any of these three tissue-specific promoters did not  
355 result in reduced body size (Supplementary Figure 4E). To validate that the neuronal  
356 TIR1 was functional, we crossed neuronal TIR1 into *daf-16(ot853 [daf-*  
357 *16::linker::mNG::3xFLAG::AID])* (Hobert, 2019) and observed that DAF-16::mNG was  
358 selectively degraded in neurons upon auxin treatment (Supplementary Figure 5A). We  
359 found that depletion of DAF-2 in neurons caused egg retention and germline shrinkage  
360 (Figures 3F, 3E). Interestingly, the germline shrinkage and egg retention phenotypes  
361 were temperature-dependent, suggesting some interaction of temperature and  
362 neuronal DAF-2 abundance. Thus, some *daf-2*-phenotypes are initiated from a single  
363 tissue, whereas others might be due to a multiple tissue interplay.

364

### 365 **Tissue-specific AID reveals different requirements for DAF-2 in neurons and** 366 **intestine for longevity and oxidative stress resistance**

367 Previously, transgenic expression of wild-type copies of DAF-2 in neurons or intestine  
368 was shown to partially suppress the longevity of *daf-2(e1370)* mutants at 25°C  
369 (Wolkow et al., 2000). Taking advantage of our unique AID system, we wanted to ask

370 whether the degradation of DAF-2 in a single tissue would be sufficient to induce  
371 longevity. We found that either neuronal or intestinal depletion of DAF-2 alone was  
372 sufficient to extend lifespan, although not to the extent as when DAF-2 is degraded in  
373 all tissues (Figure 4A; Supplementary Table 1). Therefore, we asked whether tissue-  
374 specific DAF-2 degradation was also sufficient for stress resistance seen in *daf-2*  
375 mutant animals (Ewald et al., 2018; Gems et al., 1998). Auxin-induced degradation of  
376 DAF-2 in all tissues resulted in increased oxidative stress resistance, comparable to  
377 previous for *daf-2(e1370)* mutants (Figure 4B). We observed improved oxidative stress  
378 resistance when we depleted DAF-2 in the intestine, but not in neurons (Figures 4C,  
379 4D, Supplementary Figures 5b, 5C). This implies that DAF-2 in different tissues  
380 orchestrates systemic signaling for organismal lifespan and stress resistance.  
381 Furthermore, reducing DAF-2 levels, specifically in the intestine, promotes longevity  
382 and stress resistance without causing dauer-associated phenotypes.

383

### 384 ***skn-1* works in a temperature-sensitive manner but independently of dauer-** 385 **associated reprogramming**

386 We have previously shown that the transcription factor SKN-1/NRF1,2,3 is localized in  
387 the nucleus at 15°C or 25°C in *daf-2(e1370)* mutants (Ewald et al., 2015), suggesting  
388 SKN-1 activation occurs under reduced insulin/IGF-1 receptor signaling conditions  
389 (Tullet et al., 2008). Intriguingly, *skn-1* activity is necessary for full lifespan extension  
390 of *daf-2(e1370)* mutants only at 15°C but not at 25°C (Ewald et al., 2015). We  
391 hypothesized that *skn-1* requirements for lifespan extension become masked when  
392 dauer-associated reprogramming conditions are triggered at the higher temperatures  
393 (Ewald et al., 2018). Because auxin-treated DAF-2::degron AID animals exhibit dauer-  
394 associated traits during adulthood at 15°C, we asked whether the lifespan extension



395 caused by DAF-2::degron AID upon auxin treatment at 15°C is *skn-1*-independent. We  
396 found that the lifespan extension in DAF-2::degron animals fully required *skn-1* at  
397 15°C. Surprisingly, however, a loss of *skn-1* extended the median lifespan of DAF-  
398 2::degron animals at 25°C (Figures 4E, 4F; Supplementary Table 1). This suggests  
399 that *skn-1* may function independently from dauer-associated reprogramming  
400 pathways at 15°C. Furthermore, the increased longevity seen in DAF-2::degron  
401 animals may result from a differential transcriptional program at higher temperatures  
402 compared to lower temperatures.

403

#### 404 **Late-life application of AID of DAF-2 increases lifespan**

405 Finally, we asked whether it would be possible to promote longevity in extreme geriatric  
406 animals by depleting DAF-2 by AID. Previous studies using RNAi indicated that  
407 reduced *daf-2* expression extended lifespan when started at day 6 of adulthood but not  
408 later (Dillin et al., 2002), raising the question of whether *daf-2*-longevity induction is  
409 possible beyond the reproductive period (day 1-8 of adulthood). To address this, we  
410 maintained DAF-2::degron animals on control plates and shifted them to 1 mM auxin  
411 containing plates at day 0 (L4) up to day-20 of adulthood (Figure 5A). We found that  
412 shifting the animals past the reproductive period at day 10 and day 12 still led to an  
413 increase in lifespan by 48-72% and 49-57%, respectively (Figure 5A, Supplementary  
414 Table 1). Since transferring old *C. elegans* to culturing plates without bacterial food  
415 can also increase lifespan past reproduction (Smith et al., 2008), we decided to top-  
416 coat lifespan plates with auxin late in life. We observed lifespan extension of animals  
417 by supplementing auxin very late during lifespan at day 25 of adulthood, at a time at  
418 which already approximately 50% of the population had died (Figures 5B-D,  
419 Supplementary Table 1). This demonstrates that reducing insulin/IGF-1 receptor

420 signaling is feasible in geriatric *C. elegans*. Thus, our use of AID to selectively degrade  
421 the DAF-2 protein suggests that targeting the *daf-2* signaling pathway late in life is  
422 sufficient to extend lifespan.

423

## 424 **Discussion**

425 For longevity interventions to be efficient without causing undesired side effects, the  
426 time point of treatment must be chosen carefully. This is especially important for  
427 pathways such as the insulin/IGF-1 pathways that are essential for growth and  
428 development (Kenyon, 2010). Although the importance of DAF-2 in regulating lifespan  
429 is well-established, the consequences of late-in-life inhibition remained unknown.

430

431 Here we demonstrate that late-life degradation of *daf-2* extends lifespan. In this work,  
432 we have effectively engineered a degron tag into the endogenous *daf-2* locus using  
433 CRISPR, representing the first report of auxin-induced degradation (AID) of a  
434 transmembrane receptor *in vivo*. DAF-2 receptor levels are efficiently degraded via  
435 AID. AID of DAF-2 is functional at three distinct life stages, affecting dauer formation  
436 specifically during development, longevity, stress resistance, growth-related  
437 phenotypes during early adulthood, and finally longevity during post-reproductive  
438 geriatric stages.

439

440 It is well-established that DAF-2/insulin/IGF-1 receptor signaling connects nutrient  
441 levels to growth and development (Murphy, 2013). This is attributed to insulin-like  
442 peptides binding DAF-2 and activating a downstream phosphorylation kinase cascade  
443 that adapts metabolism (Murphy, 2013). Surprisingly, we find that DAF-2 receptor  
444 abundance is linked to nutrient availability and dietary content. Starving *C. elegans*

445 decreases DAF-2 receptor abundance consistent with previous *in-situ* antibody  
446 staining (Kimura and Riddle, 2011), whereas mimicking a high-energy diet by adding  
447 glucose to the bacterial food source increases DAF-2 receptor abundance. This  
448 suggests an additional layer of regulating insulin/IGF-1 signaling by connecting food  
449 cues to adapt metabolism via DAF-2 receptor levels, potentially as an internal  
450 representation of the environment.

451  
452 Environmental conditions are carefully monitored by developing *C. elegans*. First,  
453 larval stage (L1) wild-type *C. elegans* that are in food-deprived environments, that are  
454 surrounded by elevated temperatures (>27°C), and/or that are in high population  
455 densities into a pre-dauer L2d stage, where they continue monitoring their environment  
456 prior to completely committing and molting into dauers (Hu, 2007; Karp, 2018).  
457 However, previous temperature-shift experiments (from 15°C to 25°C) with *daf-2*  
458 mutants have indicated the existence of a “dauer decision time-window” between the  
459 L1 and L2 stage (Swanson and Riddle, 1981). By manipulating DAF-2 levels directly  
460 using AID, we found that AID-degradation of DAF-2 during a narrow time period in the  
461 mid-L1 stage is sufficient to induce dauer formation, suggesting that the decision to  
462 enter dauer relies upon an all-or-nothing threshold of DAF-2 protein levels. This  
463 decision is uncoupled from temperature or food abundance and occurs irrespective of  
464 the conditions present later during L2 or L2d-predauer. Thus, absolute DAF-2 protein  
465 abundance appears to be the key (if not sole) factor in the animal’s decision to enter  
466 into the dauer state during early development.

467  
468 Although IIS is reduced in *daf-2(e1370 or e1368)* mutants at lower temperatures  
469 (Ewald et al., 2018; 2015; Gems et al., 1998), dauer larvae are formed only when these

470 *daf-2* mutants are exposed to higher temperatures. The observation that mutant DAF-  
471 2 protein (Kimura and Riddle, 2011) but not wild-type DAF-2 protein (Figure 5) is lost  
472 at more elevated temperatures suggests a model in which the DAF-2 mutant protein  
473 becomes unstable with increasing temperatures and might be subsequently targeted  
474 for degradation. This hypothesis helps to explain why strong class II *daf-2* mutants,  
475 such as *daf-2(e979)* and *daf-2(e1391)*, which have much lower DAF-2 protein levels  
476 at 15°C and 25°C compared to other *daf-2* mutants (Tawo et al., 2017), exhibit higher  
477 propensities toward dauer formation at any temperature (Gems et al., 1998). Thus, the  
478 severity of classical *daf-2* mutant alleles in regards to dauer formation and adulthood  
479 dauer traits might also be linked to DAF-2 receptor abundance.

480

481 At all temperatures, *daf-2* mutants go through an alternative pre-dauer stage (L2d)  
482 even if they later develop into gravid adults (Karp, 2018; Ruaud et al., 2011). This  
483 suggests that *daf-2* mutants may instead commit to an alternative developmental path  
484 that results in reprogrammed physiology carried over into adulthood. This is evident in  
485 adult *daf-2* class II mutants at higher temperatures, as they still exhibit significant levels  
486 of “dauer-associated phenotypes” (Ewald et al., 2018). In these animals, a clear  
487 remodeling of the body and internal organs, including constriction of the pharynx and  
488 shrinkage of the germline, remains present, along with an altered neuronal morphology  
489 and electrical synapse connectome that drives behavioral changes such as  
490 quiescence, diminished foraging behavior, and altered egg-laying programs<sup>12,15,19-</sup>  
491<sup>23,36</sup>. Since adult-specific treatment with *daf-2* RNAi increases lifespan without eliciting  
492 these dauer-associated traits (Ewald et al., 2015), this has suggested that these dauer  
493 traits of *daf-2* mutants are remnants of the animals' time in the “alternative” L2d  
494 developmental stage. In this study, however, we show that L4-specific AID of the DAF-

495 2::degron results in non-conditional reduction of body size and brood size, whereas  
496 egg retention and germline shrinkage only occurs at higher temperatures. This  
497 indicates that the non-conditional dauer traits are not a residual effect of the L2d  
498 developmental program but instead are side-effects caused by reducing the functions  
499 of DAF-2 related to the regulation of growth.

500

501 Additional temperature-sensitive dauer traits of egg-retention and gonad shrinkage are  
502 mediated by loss of *daf-2* in neurons only at higher temperatures. Why these traits only  
503 manifest at higher temperature remains unclear. One explanation may be that DAF-2  
504 levels are reduced in temperature-sensing neurons, which then elicits a systemic effect  
505 that drives germline shrinkage and egg-retention. Neurons are refractory to RNAi,  
506 suggesting that *daf-2(RNAi)* effects work through other tissues than neurons to extend  
507 lifespan. Furthermore, treating Class I mutants *daf-2(e1368)* with *daf-2(RNAi)* doubles  
508 their longevity without causing adult dauer traits (Arantes-Oliveira et al., 2003),  
509 suggesting that *daf-2(RNAi)* would lower DAF-2 receptor levels in other tissues than  
510 neurons for this additive longevity effect. Consistent with neuronal regulation of these  
511 traits is that *daf-2* RNAi applied to wild type does not result in dauers but when applied  
512 to neuronal-hypersensitive RNAi *C. elegans* strains results in dauer formation (Dillin et  
513 al., 2002; Ewald et al., 2015; S. Kennedy et al., 2004). We find that DAF-2 degradation  
514 in neurons or intestine increases lifespan. Given that reducing DAF-2 in neurons  
515 results in dauer traits at higher temperatures, one might target intestinal DAF-2 for  
516 degradation to uncouple from any dauer traits. Yet, DAF-2 is essential for growth. We  
517 find the best time point for DAF-2 inhibition is rather late in life to by-pass these  
518 undesired side-effects to promote longevity.

519

520 We find that as late as day-25 of adulthood, when about 50% of the population has  
521 died, AID of DAF-2 is sufficient to increase lifespan. The only application that was able  
522 to also increase the lifespan that late was transferring old *C. elegans* to culturing plates  
523 without bacterial food (Smith et al., 2008). But *C. elegans* do not feed after reaching  
524 mid-life (Collins et al., 2008; Ewald et al., 2016), suggesting it is not the intake of  
525 calories that promotes longevity. Could it be that the old *C. elegans* smell or sense the  
526 absence of food and thereby reduce DAF-2 levels to promote longevity? It would be  
527 interesting to determine if late-life bacterial deprivation works synergistically to DAF-2  
528 AID or not in future studies.

529

530 In mammals, mid-life administration of IGF-1 receptor monoclonal antibodies to 78-  
531 weeks old mice (a time point at which all mice are still alive and 6-weeks before first  
532 mice start to die) is sufficient to increase their lifespan and improves their healthspan  
533 (Mao et al., 2018). Other parallels between mammals and nematodes are the tissues  
534 from which the insulin/IGF-1 receptor induces longevity. Brain-specific heterozygous  
535 IGF-1 receptor knockout mice are long-lived (Kappeler et al., 2008), whereas adipose-  
536 specific insulin receptor knockout results in longevity (Blüher et al., 2003). Since *daf-2*  
537 is considered the common ancestor gene to both insulin receptor and IGF-1 receptor  
538 (Kimura et al., 1997), it is interesting that AID of DAF-2::degron in neurons or in the  
539 major fat-storage tissue intestine was sufficient to increase the lifespan of *C. elegans*.

540

541 Although it is known that neurons and intestine are important for food perception and  
542 regulation of food intake, the effects of food perception or intake on insulin receptor

543 and IGF-1 receptor levels is less understood. Starving rats for three days increases  
544 the abundance of insulin-bound insulin receptors (KOOPMANS et al., 1995), maybe to  
545 allow more glucose uptake. It is unknown whether prolonged starvation would lead to  
546 lower basal insulin/IGF-1 receptor levels. However, genetic alterations of the IGF-1  
547 receptor levels are associated with altered lifespan. For instance, heterozygous IGF-1  
548 receptor knockout mice, which have lower IGF-1 receptor levels, have an increased  
549 lifespan (Holzenberger et al., 2003; Kappeler et al., 2008; Xu et al., 2014).  
550 Overexpression of the short isoform of p53 (p44) increases IGF-1 receptor levels and  
551 shortens the lifespan of mice (Maier et al., 2004). Furthermore, administration of  
552 recombinant human IGF-1 increases IGF-1 receptor abundance in murine embryonic  
553 cells (Maier et al., 2004). Food components themselves can affect insulin receptor  
554 levels. For instance, palmitate activates PPAR $\alpha$  to induce miR-15b that binds insulin  
555 receptor mRNA for degradation (Li et al., 2019). Whether food components can  
556 regulate insulin/IGF-1 receptor levels via E3 ligase-mediated degradation in mice  
557 would be an exciting aspect for future research.

558

559 There is some evidence that E3 ligases have important physiological functions in  
560 regulating insulin/IGF-1 receptor abundance. For instance, endogenous E3 ligase  
561 CHIP regulates insulin/IGF-1 receptor levels in *C. elegans*, *Drosophila*, and human cell  
562 cultures (Tawo et al., 2017). In mice, the muscle-specific mitsugumin 53 (MG53) E3  
563 ligase targets the insulin receptor for degradation (Song et al., 2013). High-fat diet  
564 results in the reduction of insulin receptor levels (Li et al., 2019) via higher MG53-  
565 mediated degradation (Song et al., 2013). MG53 is upregulated under a high-fat diet  
566 in mice, and MG53<sup>-/-</sup> deficient mice are protected from high-fat diet-induced obesity,

567 insulin resistance, and other metabolic syndrome associated phenotypes (Song et al.,  
568 2013). Furthermore, another E3 ligase MARCH1, is overexpressed in obese humans  
569 and targets the insulin receptor for ubiquitin-mediated degradation (Nagarajan et al.,  
570 2016). Taken together, this suggests that food abundance controls mammalian insulin  
571 receptor levels via E3 ligase targeted degradation. Although in *C. elegans*, we found  
572 the opposite changes in DAF-2 receptor levels, which were reduced upon starvation  
573 and increased upon high glucose feeding, it suggests that nutritional cues regulate  
574 insulin/IGF-1 receptor levels via a variety of mechanisms, including ubiquitination and  
575 proteasomal degradation, across species.

576

577 In summary, we have demonstrated that late-life interventions can increase lifespan.  
578 We have established that auxin-induced degradation is suitable for targeting  
579 transmembrane receptors for non-invasive manipulations during developmental and  
580 longevity *in-vivo* studies. Using the AID of DAF-2, we reconciled a longstanding  
581 question by providing evidence that dauer-traits are not a spill-over of reprogrammed  
582 physiology from developing L2d pre-dauers. Instead, the essential growth-related  
583 functions of DAF-2 are causing deficits when applied during development or growth  
584 phases. We have shown that tissue-specific or interventions beyond reproduction or  
585 growth extend lifespan without pathology or deficits. Degradation of DAF-2/insulin/IGF-  
586 1 receptor might not be an artificial intervention since DAF-2/insulin/IGF-1 receptor  
587 abundance is read-out to adapt metabolism to the environment and food status. E3  
588 ligases might play an important role in regulating DAF-2/insulin/IGF-1 receptor levels.  
589 Dissecting intrinsic DAF-2/Insulin/IGF-1 receptor abundance in response to nutritional



590 cues may impact our understanding of nutrient-sensing in promoting health during old

591 age.

592

593 **Figures**

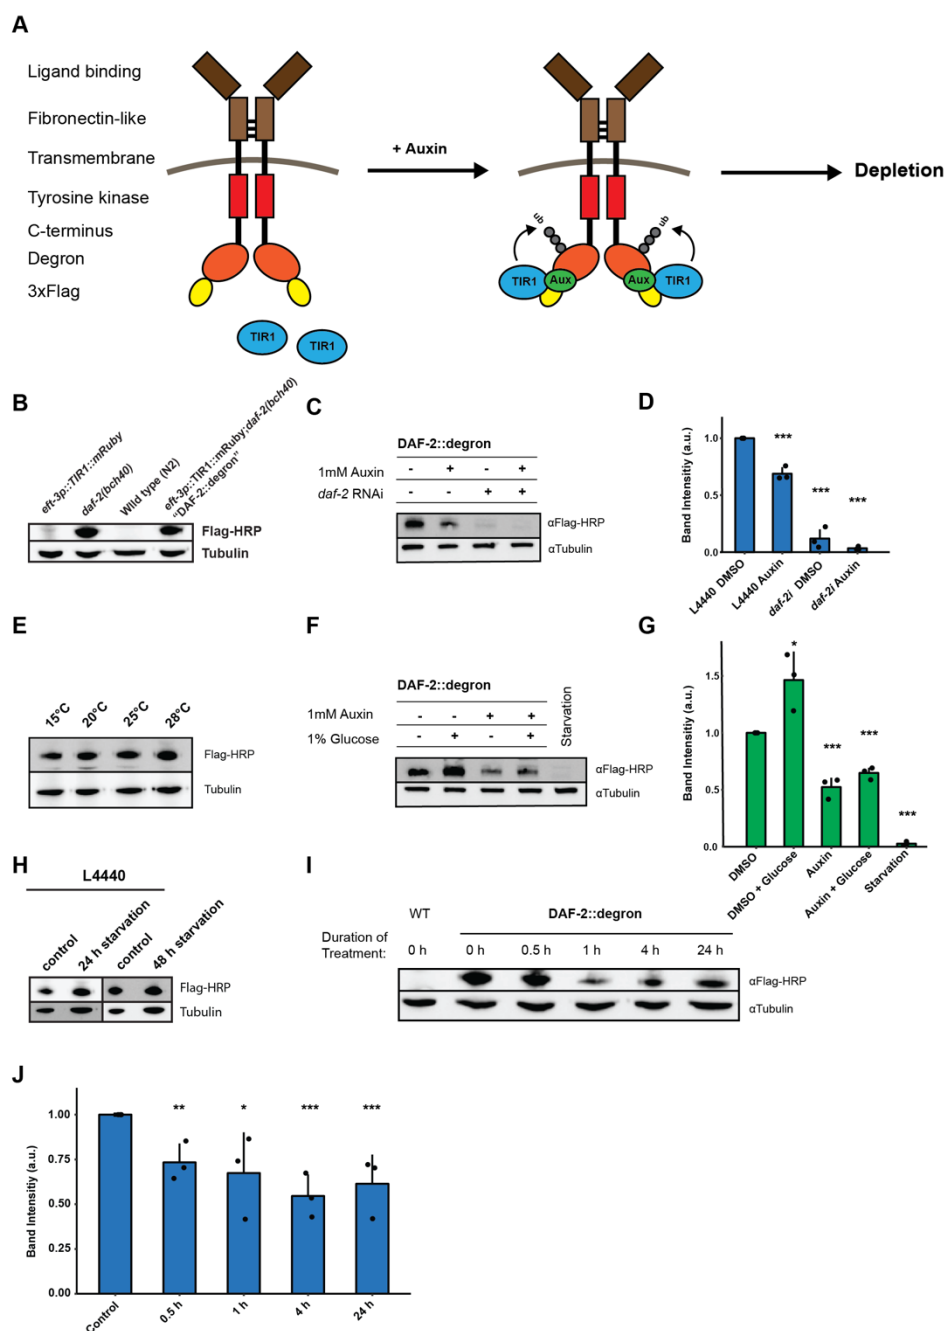

594

595

596 **Figure 1. Degrone-tagged DAF-2 is functional and susceptible to auxin-mediated**  
597 **degradation**

598 (A) Schematic illustration of AID-mediated DAF-2 receptor depletion in *daf-*  
599 *2(bch40)* *C. elegans*.

600 (B) Immunoblot analysis of *eft-3p::TIR1::mRuby::unc-54* 3'UTR, *daf-2(bch40)*, wild  
601 type (N2) and DAF-2::degron (*eft-3p::TIR1::mRuby::unc-54* 3'UTR; *daf-*  
602 *2(bch40)*).

603 (C) Immunoblot analysis of “DAF-2::degron” animals after treatment of 1 mM auxin  
604 and *daf-2* RNAi treatment for 48 hours on the second day of adulthood.

- 605 (D) Quantification of c) from  $n = 3$  independent experiments. Error bars represent  
606 s.d. Two-sided  $t$ -test was used for statistical analysis. \*:  $p < 0.05$ , \*\*:  $p < 0.01$ ,  
607 \*\*\*:  $p < 0.001$ .
- 608 (E) Immunoblot analysis of DAF-2::degron animals showed no decrease of DAF-2  
609 levels at high temperatures. Animals were raised at 15°C and put as L4 for 24  
610 hours at the corresponding temperature.
- 611 (F) A representative immunoblot analysis of “DAF-2::degron” animals after 1%  
612 glucose and 36 hours to 48 hours starvation on the second day of adulthood.
- 613 (G) Quantification of f) from  $n = 3$  independent experiments. Error bars represent  
614 s.d. Two-sided T-test was used for statistical analysis. \*:  $p < 0.05$ , \*\*:  $p < 0.01$ ,  
615 \*\*\*:  $p < 0.001$
- 616 (H) Immunoblot analysis of starved DAF-2::degron animals after eating HT115  
617 (L4440) bacteria. Animals were raised on OP50 at 20°C and shifted as L4 to  
618 L4440 containing FUDR. After two days there were washed off and either frozen  
619 as control, or put on empty plates and harvested after 24 or 48 hours,  
620 respectively.
- 621 (I) Immunoblot analysis of one-day-old adult DAF-2::degron animals treated with 1  
622 mM auxin for the indicated time periods.
- 623 (J) Quantification of e) from  $n = 3$  independent experiments. Error bars represent  
624 s.d. One-sided  $t$ -test was used for statistical analysis. \*:  $p < 0.05$ , \*\*:  $p < 0.01$ ,  
625 \*\*\*:  $p < 0.001$ .
- 626 For (B-J): See Data Source File 1 and 2 for raw data, full blots, and statistics.  
627

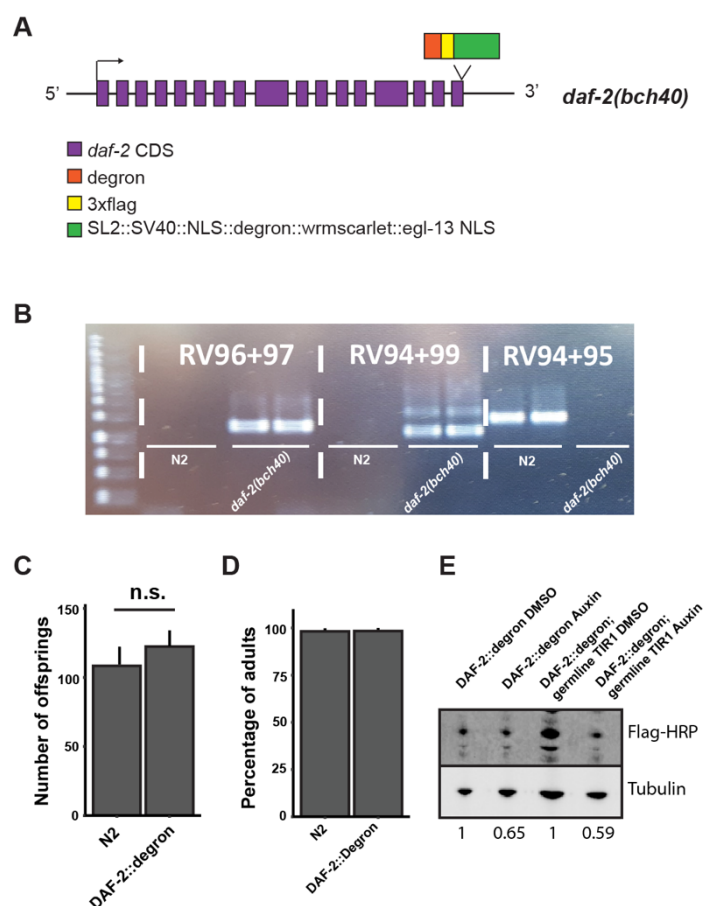

628  
629

630 **Supplementary Figure 1. Degron-tagged DAF-2 is functional and susceptible to**  
631 **auxin-mediated degradation**

632

633 (A) Schematic illustration of the *daf-2* locus of *daf-2(bch40)* [*daf-*  
634 *2::degron::3xFLAG::STOP::SL2::SV40::degron::wrmScarlet::egl-13NLS*]  
635 animals. Expression of the operon was not observed. Either it is not functional,  
636 or the levels are too low to be detected by confocal microscopy.

637 (B) PCR of wild type (N2) and *daf-2(bch40)*. Primer pair RV96 and RV97 span the  
638 3' of the insert, RV94 and RV99 span the 5' of the insert, and RV94 and RV95  
639 span the end of the gene of the wild type. The PCR product of RV96 and RV97  
640 and RV94 and RV99 have been sequenced to verify the construct's correct  
641 insertion.

642 (C) Comparison of progeny number of wild type (N2) and DAF-2::degron from n =  
643 3 independent experiments. Error bar represents s.d.

644 (D) Comparison of the developmental speed of wild type (N2) and DAF-2::degron  
645 from n = 3 independent experiments. Error bar represents s.d.

646 (E) Immunoblot analysis of DAF-2::degron and DAF-2::degron; germline TIR1 (*eft-*  
647 *3p::TIR1::mRuby::unc-54* 3'UTR; *daf-2(bch40)*; *sun-1p::TIR1::mRuby::sun-1*  
648 3'UTR) on DMSO and 1 mM auxin. The numbers below indicate the normalized  
649 value to the respective control on DMSO.

650 For (C-E), see Data Source File 1 and 2 for raw data and statistics.

651

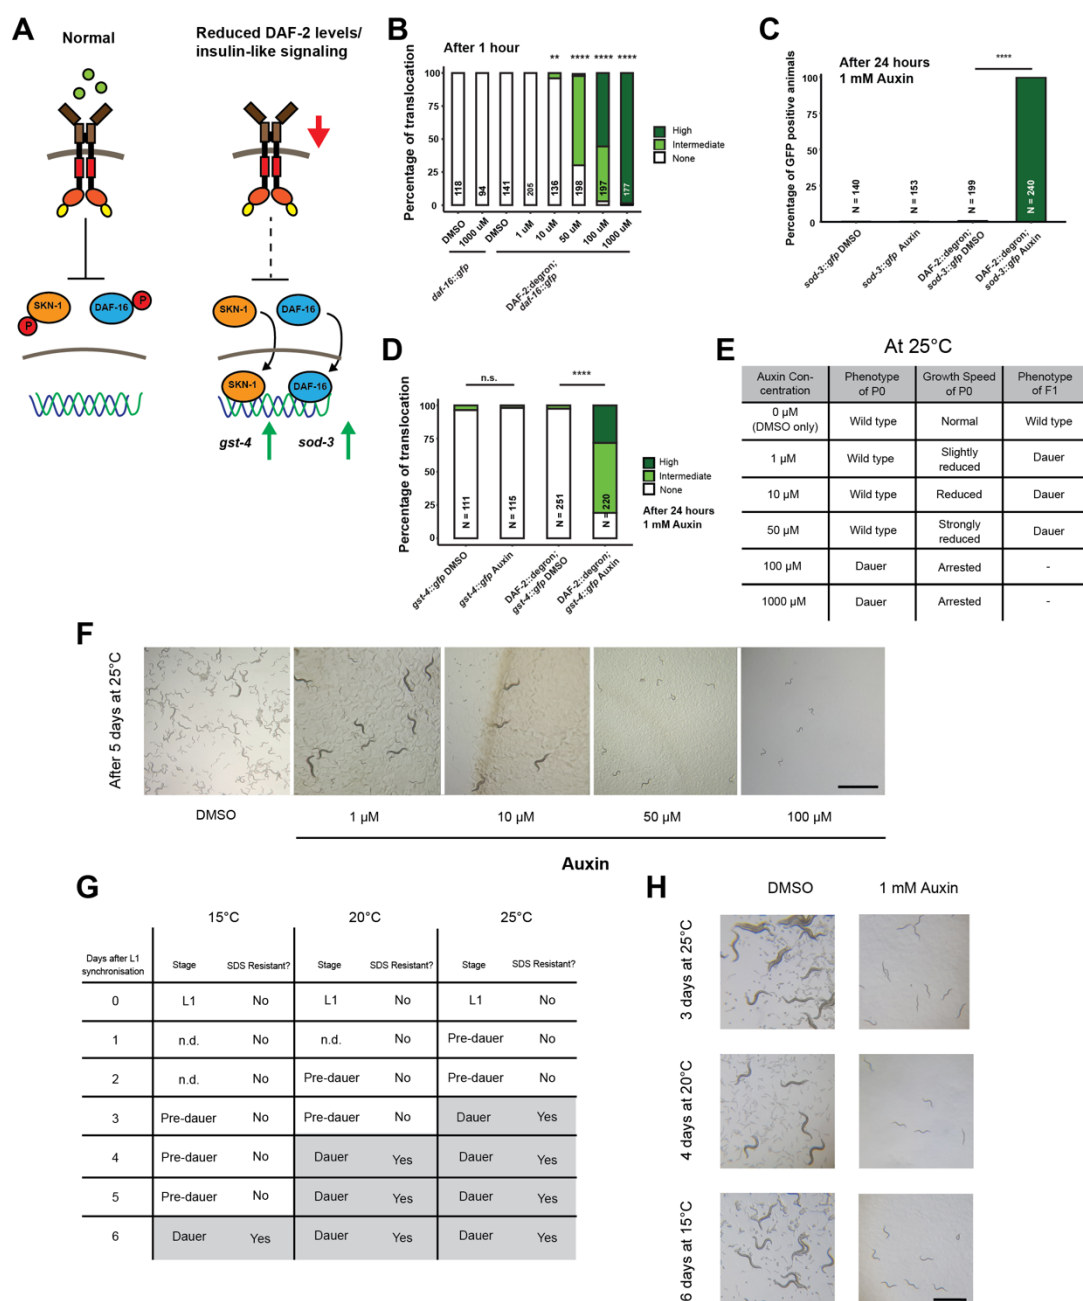

652  
653  
654  
655  
656  
657  
658  
659  
660  
661  
662  
663  
664  
665  
666  
667

**Figure 2: Inactivation of DAF-2::degron by the AID upregulated downstream reporters and caused dauer entry at any temperature**

- (A) A schematic illustration of the DAF-2 signaling pathway. DAF-2 phosphorylates the transcription factors DAF-16 and SKN-1 through a cascade of kinases and sequesters them to the cytosol. Lower DAF-2 levels or activity leads to dephosphorylation and translocation of DAF-16 and SKN-1 to the nucleus and expression of target genes like *sod-3* and *gst-4*, respectively.
- (B) One hour exposure to auxin led to nuclear translocation of DAF-16::GFP in a concentration-dependent manner in *DAF-2::degron; daf-16::gfp* animals, but not in *daf-16::gfp*.  $n > 94$  from two (for *daf-16::gfp*) or three (for *DAF-2::degron; daf-16::gfp*) independent experiments. \*\*:  $p < 0.01$ , \*\*\*\*:  $p < 0.0001$ .
- (C) Exposure to 1 mM auxin activated the reporter *sod-3::GFP* in *DAF-2::degron; sod-3::gfp* but not in animals that carry *sod-3::gfp* alone. Animals of

668 the L4 stage were quantified after 24 hours.  $n > 140$  from two (for *sod-3::gfp*) or  
669 four (for DAF-2::degron; *sod-3::gfp*) independent experiments. \*\*\*\*:  $p < 0.0001$ .  
670 (D) Exposure to 1 mM auxin activated the reporter *gst-4::GFP* in DAF-2::degron;*gst-*  
671 *4::gfp* but not in animals that carry *gst-4::gfp* alone. Animals of the L4 stage  
672 were quantified after 24 hours.  $n > 111$  from two (for *gst-4::gfp*) or four (for DAF-  
673 2::degron; *gst-4::gfp*) independent experiments. \*\*\*\*:  $p < 0.0001$ .  
674 (E) Auxin treatment of DAF-2::degron affected development. Synchronized L1 put  
675 at low concentrations (1 to 50  $\mu$ M auxin) show reduced growth speed, and their  
676 offspring enters dauer. At high concentrations (100 and 1000  $\mu$ M), the L1  
677 animals arrest and enter the dauer stage after a few days.  
678 (F) Representative pictures of growth impairment caused by auxin-mediated  
679 degradation of DAF-2 in DAF-2::degron animals at different concentrations. Bar  
680 = 1 mm.  
681 (G) Dauer entry of DAF-2::degron animals at 1 mM Auxin was temperature-  
682 independent, but the time needed for dauer entry is temporally scaled. To  
683 distinguish dauer animals from pre-dauer animals, they were treated for 15  
684 minutes with 1% SDS. Only dauer animals survived SDS treatment.

685 (H) Microscope pictures showed DAF-2::degron animals after dauer entry (right  
686 column) and control animals (left column) kept for the same amount of time at  
687 15°C, 20°C, and 25°C, respectively. Control animals were on their second day  
688 of adulthood when the auxin-treated counterparts enter the dauer stage. Bar =  
689 1 mm.

690 For (B-D), see Data Source File 1 for raw data and statistics.  
691



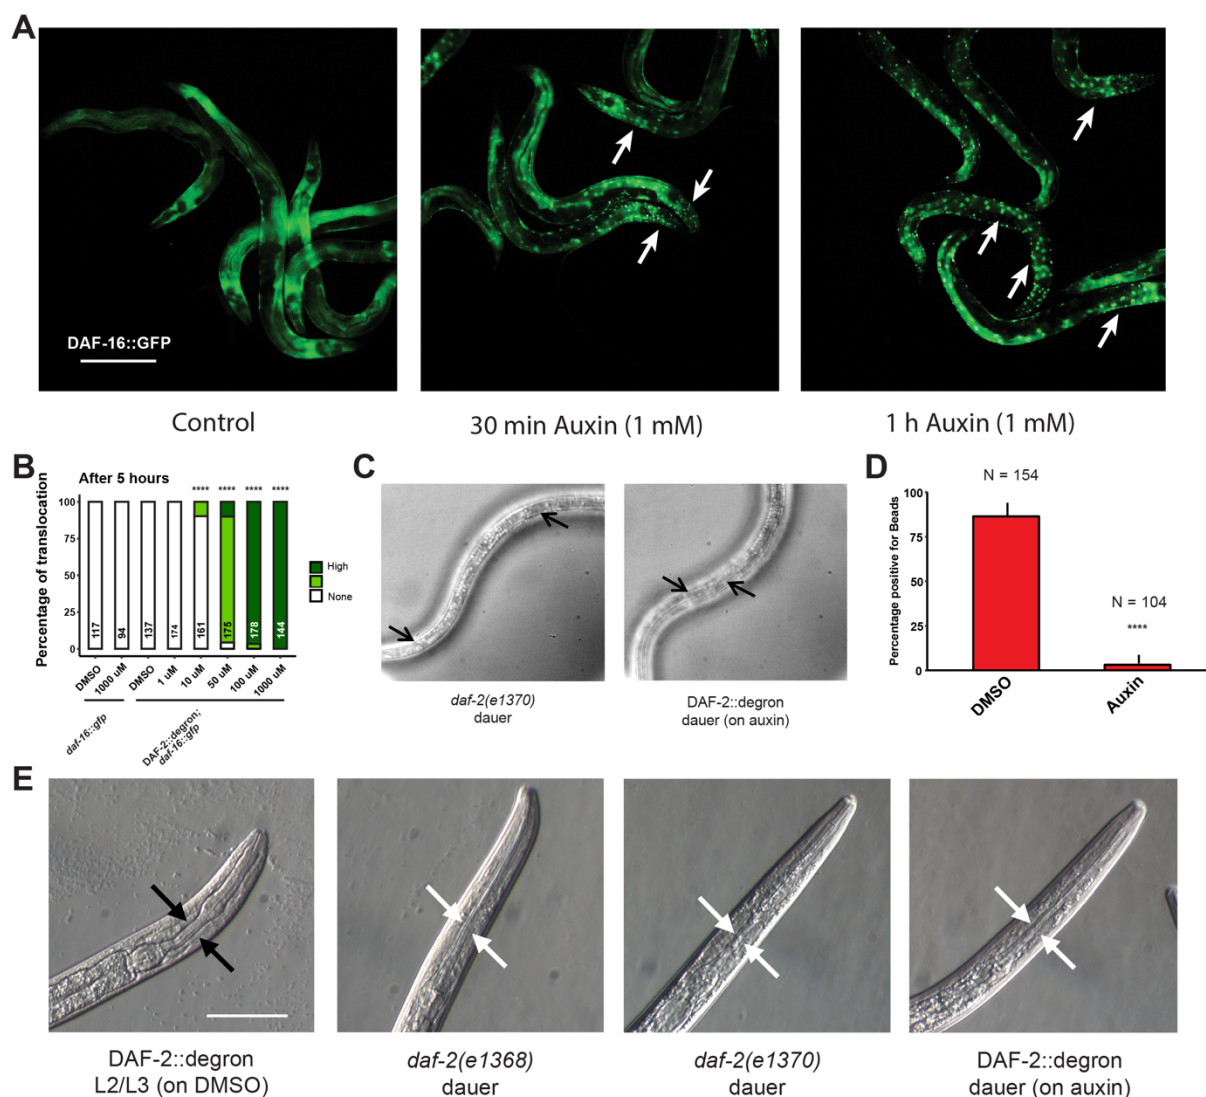

692  
693

694 **Supplementary Figure 2: Inactivation of DAF-2::degron by the AID upregulated**  
695 **downstream reporters and caused dauer entry at any temperature**

696 (A) Translocation of DAF-16::GFP in “DAF-2::degron”; *daf-16::gfp* animals was  
697 visible after 30 minutes and 1 hour of 1 mM auxin treatment. Bar = 100  $\mu$ M.

698 (B) Five hour exposure to auxin led to further nuclear translocation of DAF-16::GFP  
699 in a concentration-dependent manner in DAF-2::degron; *daf-16::gfp*, but not in  
700 *daf-16::gfp*.  $n > 94$  from two (for *daf-16::gfp*) or three (for DAF-2::degron; *daf-*  
701 *16::gfp*) independent experiments. \*\*\*\*:  $p < 0.0001$ .

702 (C) Dauer alae of *daf-2(e1370)* and DAF-2::degron animals. Arrows indicate dauer  
703 alae specific prongs. Bar = 100  $\mu$ m.

704 (D) Percentages of animals that were positive for red fluorescent beads in the  
705 intestine.  $n > 100$  animals from 3 independent experiments. Error bar represents  
706 s.d. \*\*\*\*:  $p < 0.0001$

707 (E) Images of control and dauer pharynxes. The pharynx of DAF-2::degron animals  
708 on auxin were indistinguishable from other *daf-2* mutant dauers. Black arrows  
709 indicate wild-type pharynx, and white arrows indicate dauer-typical pharynx  
710 constriction. Bar = 50  $\mu$ m.

711 For (A, D), see Data Source File 1 for raw data and statistics.

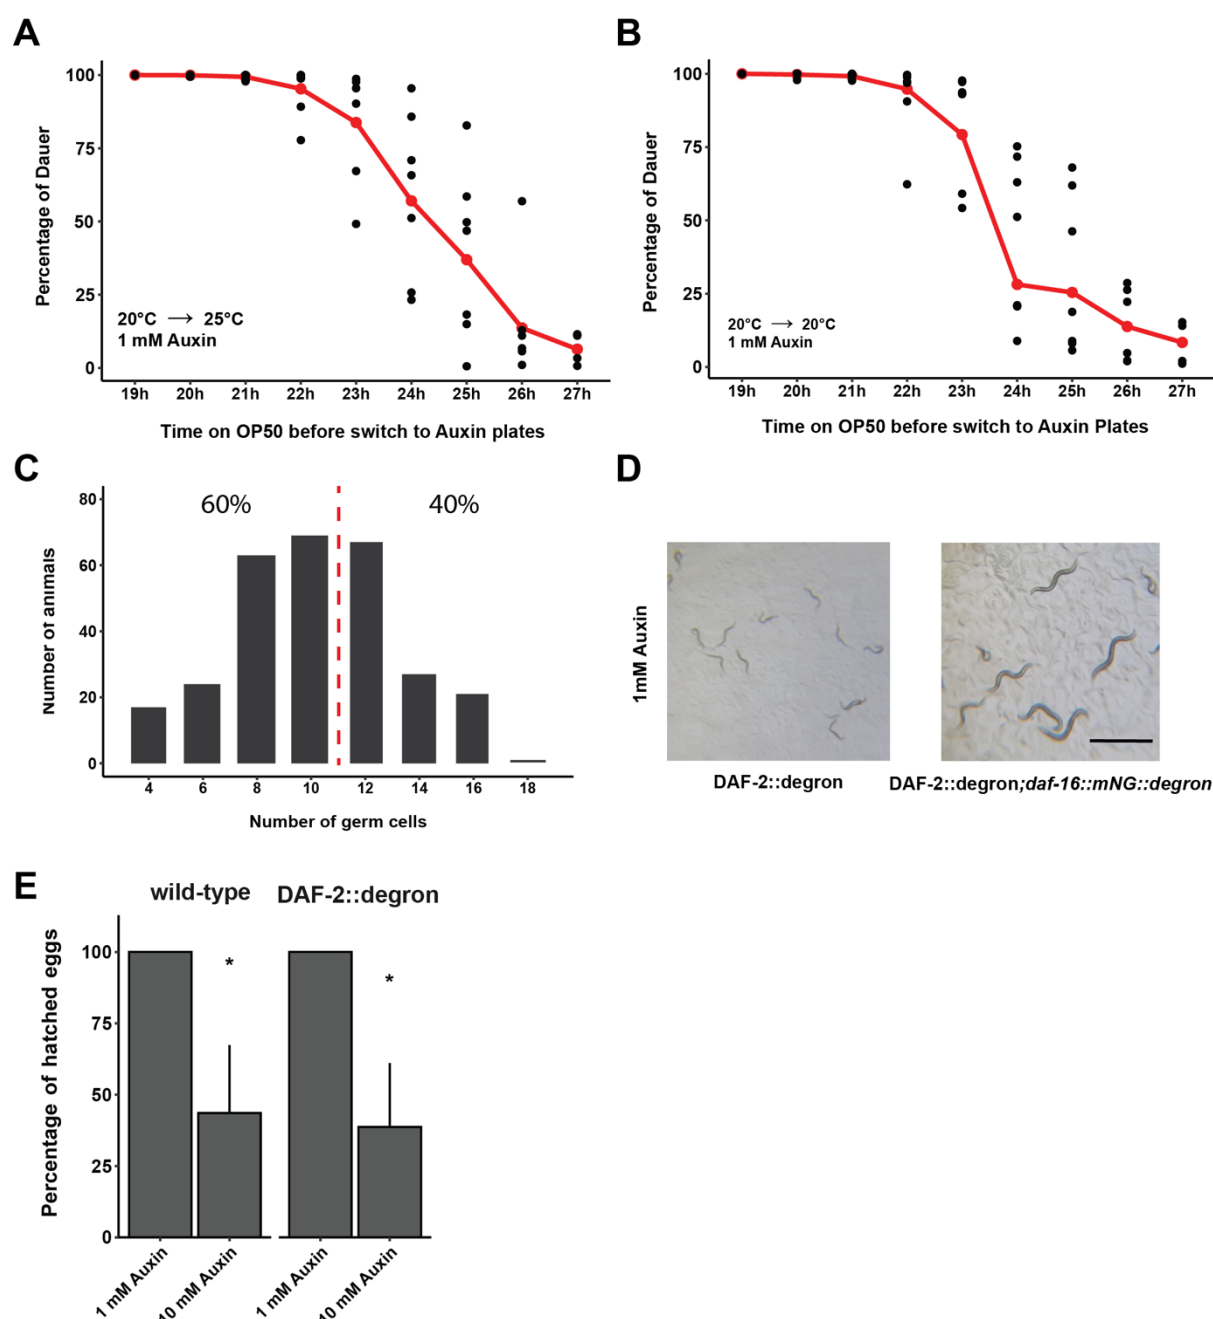

712  
713

714 **Supplementary Figure 3: Depletion of DAF-2::degron at mid-L1 promoted *daf-16*-**  
715 **dependent dauer entry.**

716 (A) Determination of the decision time point between dauer entry or continuation  
717 of normal development of DAF-2::degron animals at 25°C. The animals were  
718 synchronized for two days in M9 at 20°C, then put onto plates at 20°C. Then  
719 DAF-2::degron animals were put on plates supplemented with Auxin after the  
720 indicated time on the x-axis and shifted to 25°C. The ratio of dauers and adult  
721 animals was determined two days later. Each time point was repeated 4 to 7  
722 times with n = 976 to 2022. The red line shows the average, black dots  
723 indicate single measurements.

724 (B) Determination of the decision time point between dauer entry or continuation  
725 of normal development of DAF-2::degron animals at 25°C. The animals were  
726 synchronized for two days in M9 at 20°C, then put onto plates at 20°C. Next,



727 DAF-2::degron animals were put on plates supplemented with Auxin after the  
728 indicated time on the x-axis and shifted to 20°C. The ratio of dauers and adult  
729 animals was determined 3 days later. Each time point was repeated 4 to 7  
730 times with n = 735 to 1791. The red line shows the average, black dots  
731 indicate single measurements. Note that dauers at 20°C tend to crawl off the  
732 plate, the graph is therefore only an approximation, and there are likely more  
733 dauers on the plate.

734 (C) Germ cell count of L1 after 24 to 25 hours on OP50. The dotted red line  
735 indicates a younger population that enters dauer and an older population that  
736 continues development. The percentages indicate two arbitrarily divided  
737 groups with few and many germ cells to match the observation in Figure 3a  
738 that approximately 50% of the animals continue development at 24 to 25  
739 hours. The experiment was repeated 5 times with n = 289.

740 (D) Simultaneous knockdown of degron-tagged DAF-16 in DAF-2::degron; *daf-*  
741 *16::mNG::degron* led to fertile adults. Bar = 2 mm.

742 (E) 10 mM Auxin causes embryonic lethality. The same amount of egg suspension  
743 was put on plates, and the number of offspring was counted several days later.  
744 This experiment was repeated four times for DAF-2::degron and two times for  
745 wild type. Error bar represents s.d. \*: p < 0.05

746 For (A-C, E), see Data Source File 1 for raw data and statistics.  
747  
748

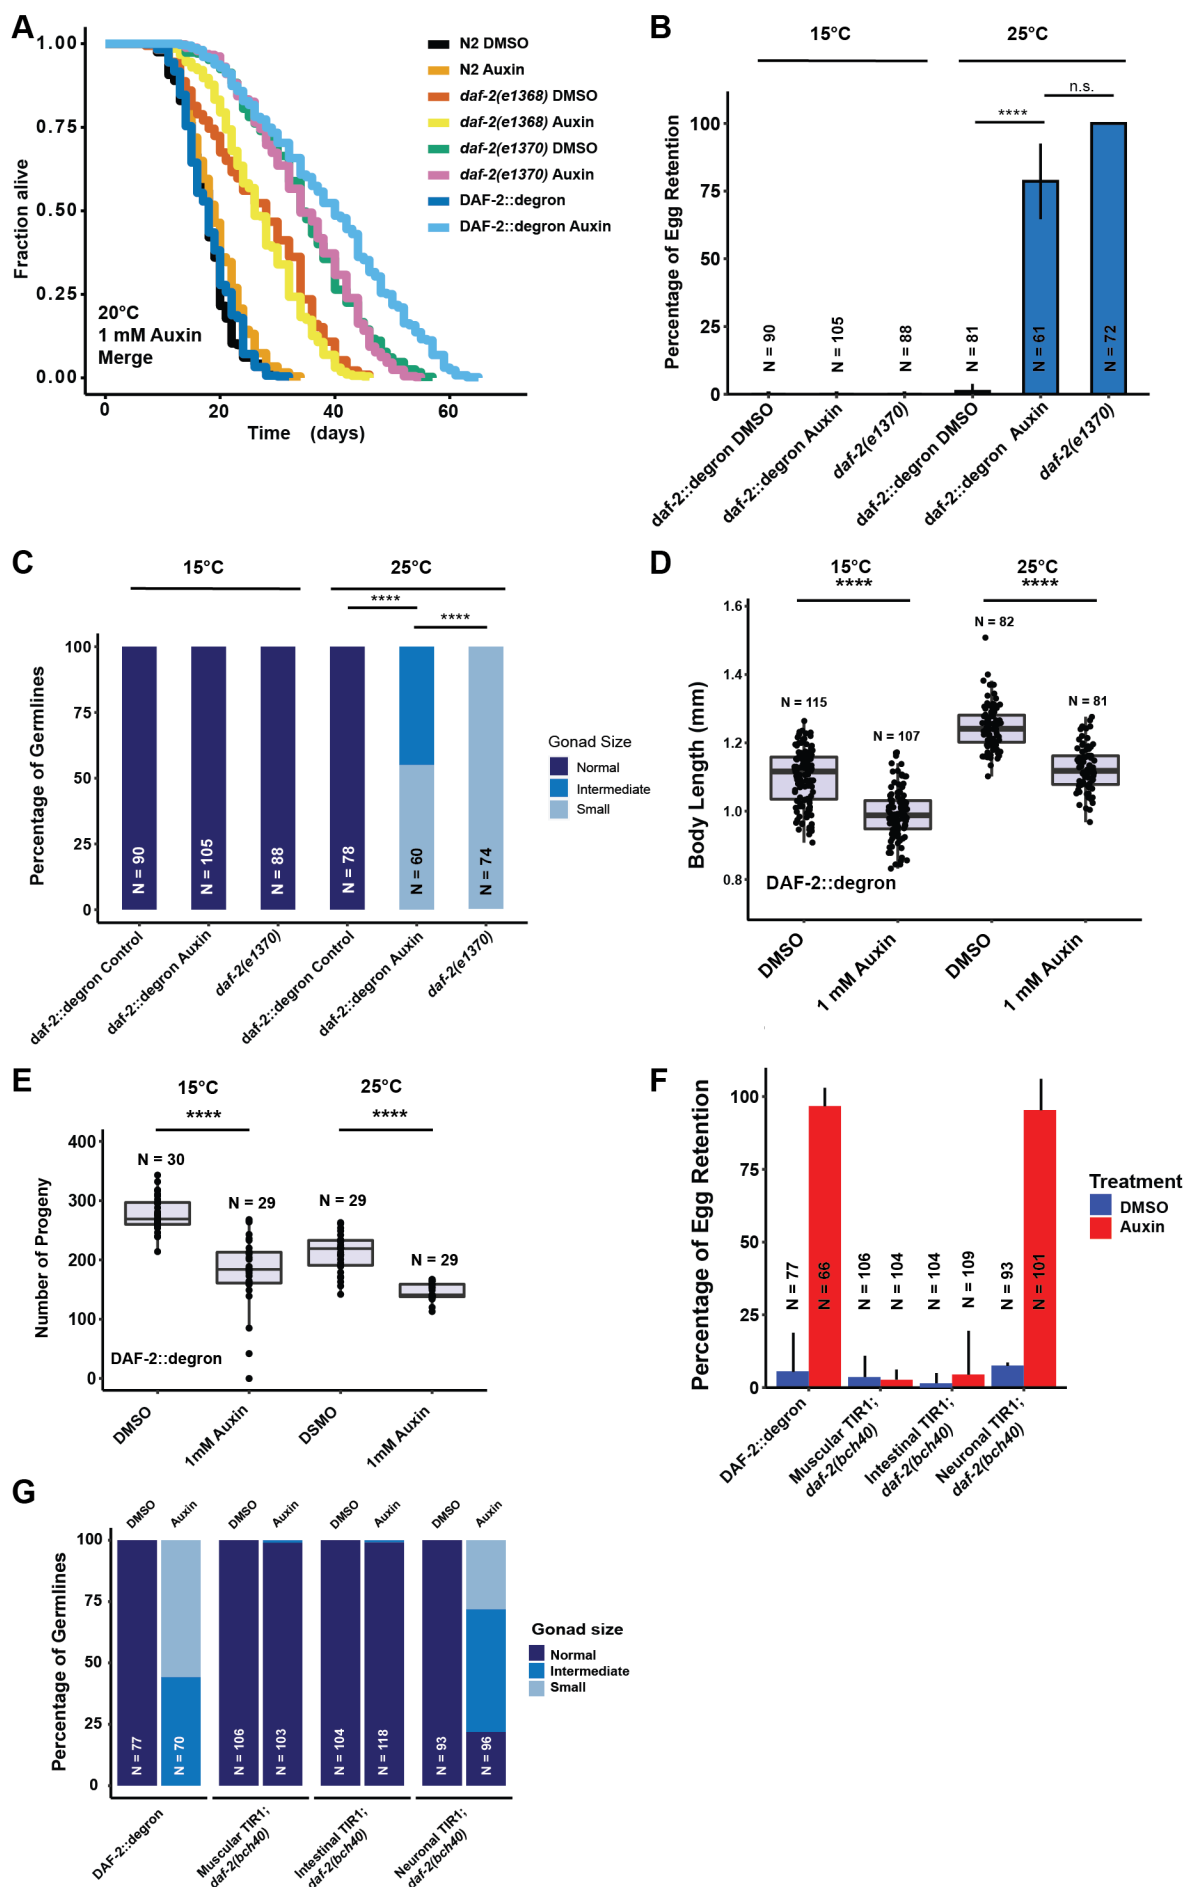

750 **Figure 3. Depletion of DAF-2::degron causes dauer-associated phenotypes at**  
751 **15°C**

752 (A) Auxin treatment extended the lifespan of DAF-2::degron animals. Animals were  
753 shifted as L4 to plates containing DMSO or 1 mM auxin at 20°C.

754 (B) 1 mM auxin treatment leads to the “dauer-associated” phenotype egg retention  
755 in DAF-2::degron. Animals were raised at 15°C and shifted as L4 to 25°C or  
756 kept at 15°C. Two days later, at 25°C and three days later at 15°C, the animals  
757 were checked for egg retention. The experiment was performed 3 independent  
758 times. Error bar represents s.d. \*\*\*\*:  $p < 0.0001$

759 (C) Gonads were shrunk after 1 mM auxin treatment in DAF-2::degron animals.  
760 Animals were raised at 15°C and shifted as L4 to 25°C or kept at 15°C. Two  
761 days later at 25°C and three days later at 15°C, the animals were checked for  
762 gonad size. The experiment was performed 3 independent times. \*\*\*\*:  $p <$   
763  $0.0001$

764 (D) 1 mM auxin treatment decreased the body size of DAF-2::degron animals at  
765 15°C and 25°C. Animals were raised at 15°C and shifted to 1 mM auxin or  
766 DMSO plates at the L4 stage. The experiment was performed 3 independent  
767 times. \*\*\*\*:  $p < 0.0001$

768 (E) 1 mM auxin treatment of DAF-2::degron resulted in a smaller brood size at 15°C  
769 and 25°C. Animals were shifted to 1 mM auxin or DMSO plates at the L4 stage  
770 and either kept at 15°C or moved to 25°C. The experiment was performed 3  
771 independent times. \*\*\*\*:  $p < 0.0001$

772 (F) Tissue-specific depletion of DAF-2 in neurons caused egg retention phenotype.  
773 Animals were raised at 15°C and shifted from L4 to 25°C. Two days later, the  
774 animals were checked for egg retention. The experiment was performed 3  
775 independent times. Error bar represents s.d. \*\*\*\*:  $p < 0.0001$

776 (G) Gonads were shrunk after neuronal depletion of DAF-2. Animals were raised at  
777 15°C and shifted from L4 to 25°C. Two days later, the animals were checked  
778 for gonad size. The experiment was performed 3 independent times. \*\*\*\*:  $p <$   
779  $0.0001$

780 For (A-G), see Data Source File 1 for raw data and Supplementary Table 1 for  
781 statistics and additional trials.

782  
783

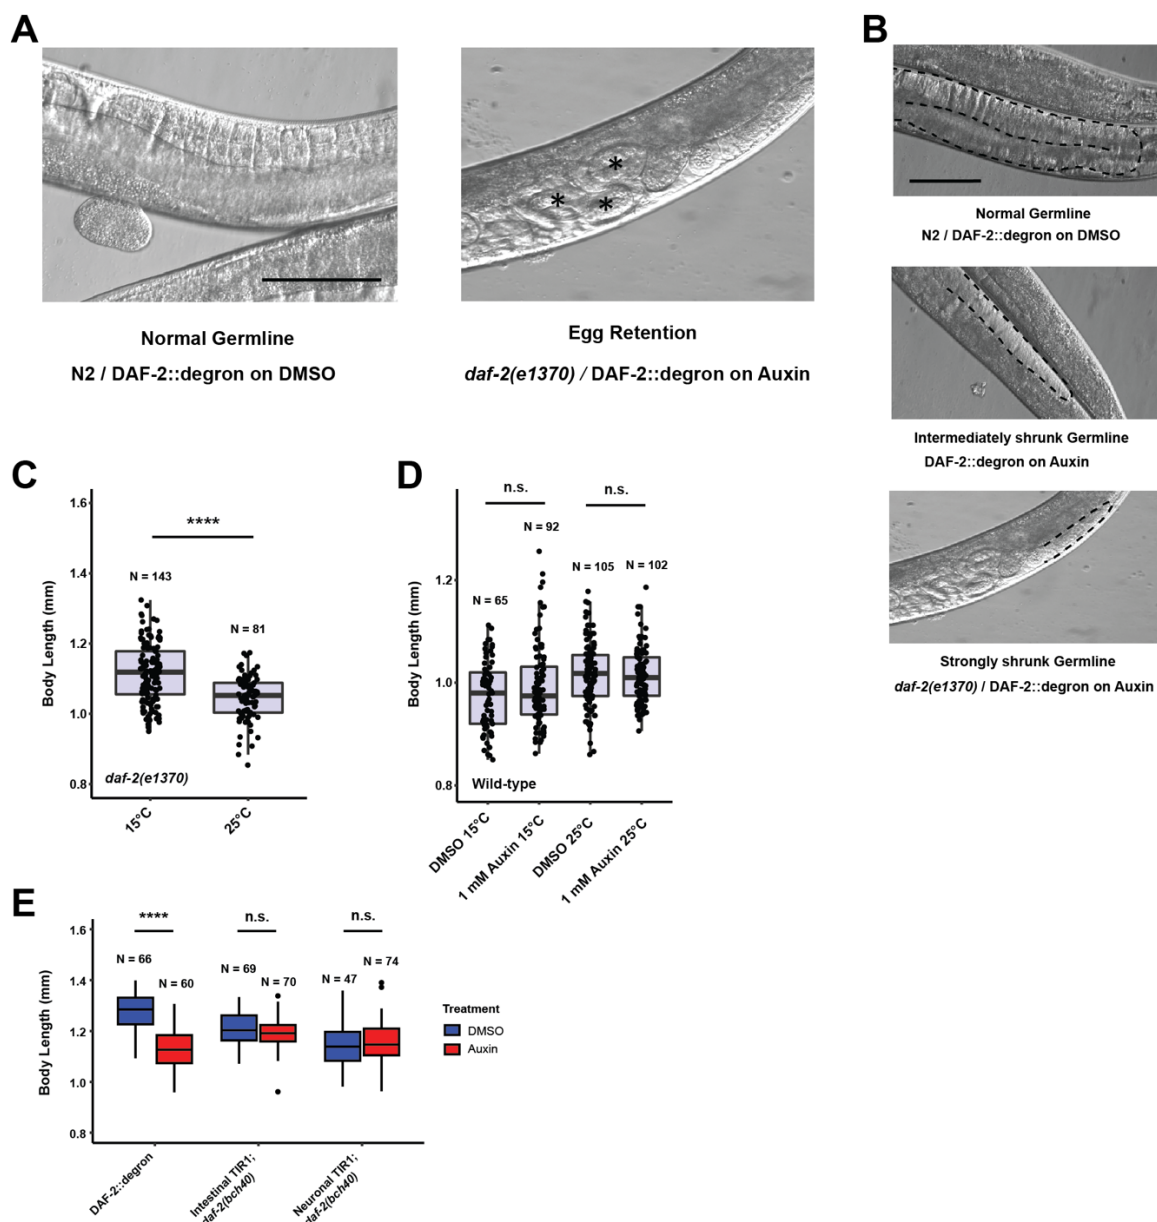

**Supplementary Figure 4. Depletion of DAF-2::degron caused dauer-associated phenotypes at 15°C**

- (A) Representative images of the egg retention phenotype. The asterisk indicates eggs that are stored in the germline. Bar = 100  $\mu$ m
- (B) Representative image of the different levels of germline sizes. Bar = 100  $\mu$ m
- (C) *daf-2(e1370)* have reduced body size at 25°C. The experiment was performed 3 independent times. \*\*\*\*:  $p < 0.0001$
- (D) Auxin did not affect body size in wild type (N2). The experiment was performed 3 independent times.
- (E) Depletion of intestinal or neuronal DAF-2::degron did not reduce body size. The experiment was performed two independent times. \*\*\*\*:  $p < 0.0001$
- For (C-E), see Data Source File 1 for raw data and statistics.

784  
785  
786  
787  
788  
789  
790  
791  
792  
793  
794  
795  
796  
797

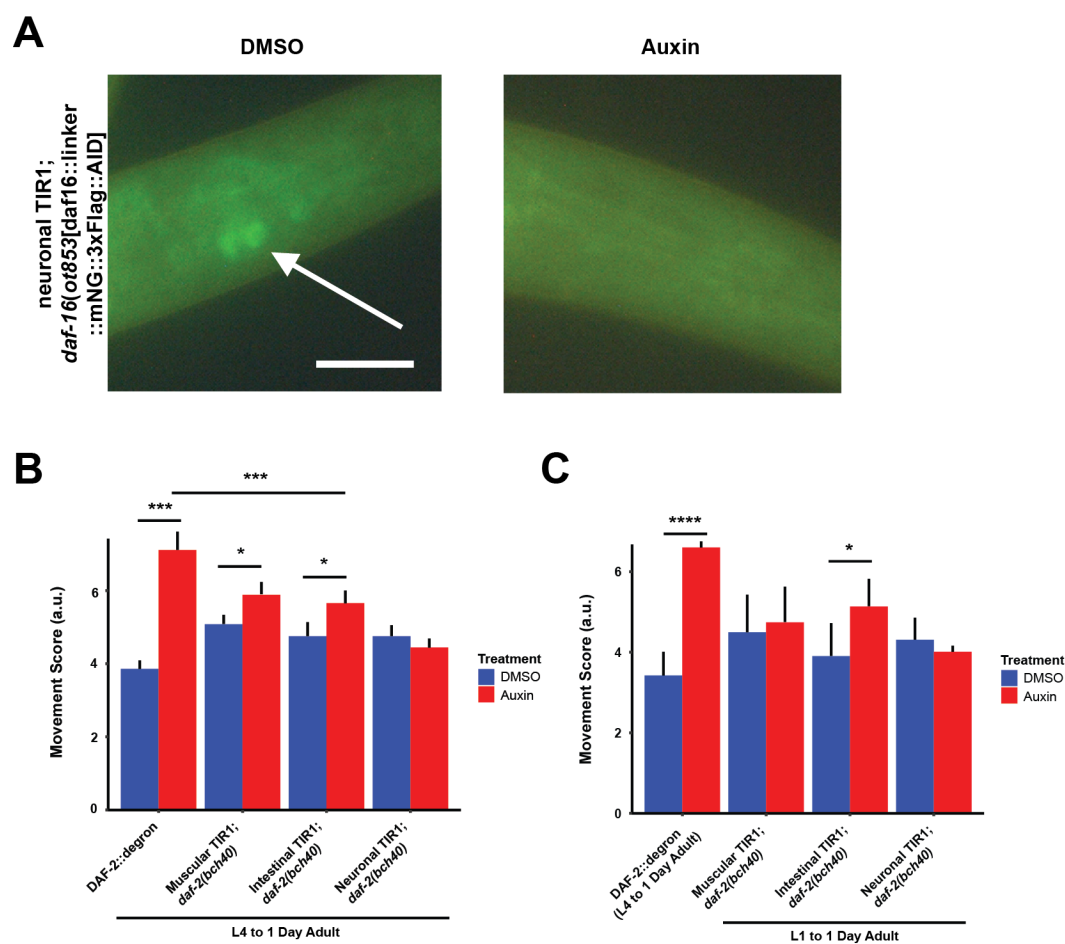

798  
799

### 800 **Supplementary Figure 5. Oxidative resistance and tissue-specific effects after** 801 **DAF-2 depletion**

802

803 (A) *daf-16(ot853)* [*daf16::linker::mNG::3xFLAG::AID*] was degraded by neuronal  
804 TIR1. Arrow indicated neuronally expressed mNeonGreen- and degron-tagged  
805 DAF-16. Animals were put for 24 hours on plates with DMSO or 1 mM Auxin,  
806 respectively. Bar = 20  $\mu$ m.

807 (B) Quantification of 1 mM auxin treatment from L4 to first day of adulthood  
808 enhanced the arsenite-induced oxidative stress resistance in DAF-2::degron,  
809 muscular TIR1; *daf-2(bch40)*, and intestinal TIR1; *daf-2(bch40)*. The experiment  
810 was performed 4 independent times (except 3 times for DAF-2::degron). Error  
811 bar represents s.d. \*:  $p < 0.05$ , \*\*\*:  $p < 0.001$ .

812 (C) Quantification of 1 mM auxin treatment from L1 to the first day of adulthood  
813 enhanced the arsenite-induced oxidative stress resistance in muscular TIR1;  
814 *daf-2(bch40)* and intestinal TIR1; *daf-2(bch40)*. DAF-2::degron was treated  
815 from L4 to the first day of adulthood to bypass dauer entry. The experiment was  
816 performed 3 independent times. Error bar represents s.d. \*:  $p < 0.05$ , \*\*\*\*:  $p <$   
817 0.0001

818 For (B-C), see Data Source File 1 and 3 for raw data, statistics, and additional trials.

819

820

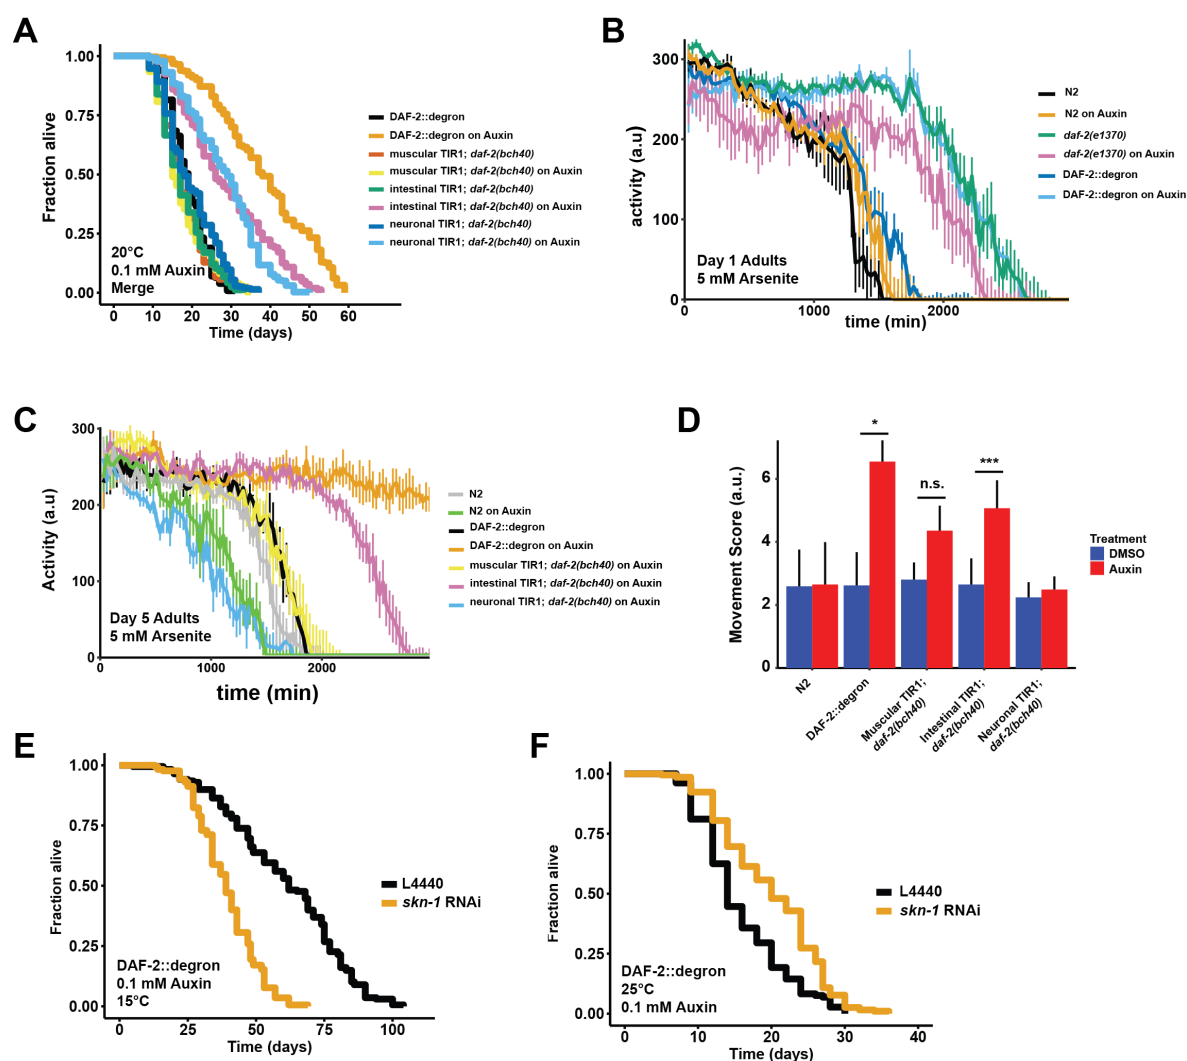

821  
822

823 **Figure 4. Tissue-specific effects after DAF-2 depletion on lifespan extension and**  
824 **reactive oxygen species resistance**

825 (A) Auxin treatment extended lifespan in aged DAF-2::degron animals. Animals  
826 were shifted from DMSO plates to plates containing 1 mM Auxin on the  
827 indicated day.

828 (B) Auxin-mediated depletion of DAF-2 enhanced oxidative stress resistance to a  
829 similar extent of *daf-2(e1370)* animals. Animals were shifted as L4 for 24 hours  
830 on plates containing DMSO or 1 mM auxin at 20°C.

831 (C) Intestinal knockdown of DAF-2 enhanced oxidative stress resistance. Animals  
832 were shifted to DMSO or 1 mM auxin plates at L4 stage and kept until day 5 of  
833 adulthood at 20°C.

834 (D) Quantification of g) from 3 independently performed experiments. Error bar  
835 represents s.d. \*: p < 0.05, \*\*\*: p < 0.001.

836 (E) *skn-1* was necessary for full lifespan extension in DAF-2 depleted animals at  
837 15°C. Animals were kept on 1 mM auxin. p < 0.0001

838 (F) Knockdown of *skn-1* extended the mean lifespan of DAF-2 depleted animals at  
839 25°C. Animals were raised at 15°C and shifted to 1 mM auxin at 25°C. p <  
840 0.0001

841 For (A-F), see Data Source File 1 and 3 for raw data and Supplementary Table 1 for  
842 statistics and additional trials.



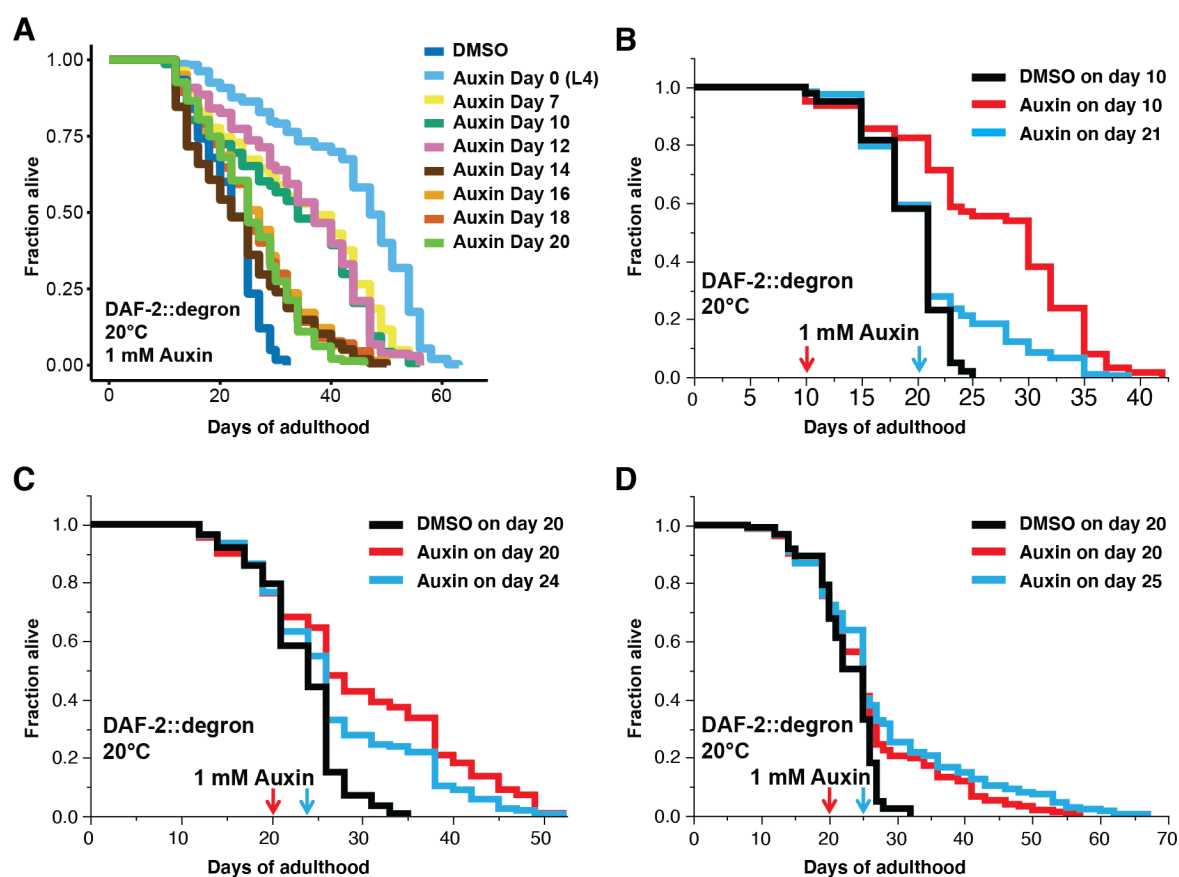

843

844

845

### Figure 5. Late-life DAF-2 depletion extended lifespan

846 (A) Auxin treatment extended lifespan in aged *DAF-2::degron* animals. Animals were  
847 shifted from DMSO plates to plates containing 1 mM Auxin at the indicated day.

848 (B-C) Top-coating plates with auxin to a final concentration of 1 mM auxin at the indicated  
849 days extended the lifespan of *DAF-2::degron* animals during aging.

850 For (A-D), see Supplementary Table 1 and Data Source File 1 for raw data, statistics,  
851 and additional independent trials.

852

853

## 854 **Materials and Methods**

### 855 **Strains**

856 All strains were maintained on NGM plates and OP50 *Escherichia coli* at 15°C as  
857 described. The strains and primers used in this study can be found in Supplementary  
858 Table 3.

859

### 860 **Statistical analysis and plotting**

861 Statistical analysis was either done by using RStudio or Excel. All plots have been  
862 made using RStudio (1.2.5001). The packages ggplot2, survminer, dplyr were required  
863 for some plots.

864

### 865 **Auxin plates**

866 Auxin (3-Indoleacetic acid, Sigma #I3750) was dissolved in DMSO to prepare a 400  
867 mM stock solution and stored at 4°C. Auxin was added to NGM agar that has cooled  
868 down to about 60°C before pouring the plates (Zhang et al., 2015). For lower  
869 concentrations (1 µM and 10 µM), the 400 mM stock dilution was further diluted in  
870 DMSO. Control plates contained the same amount of DMSO (0.25% for 1 mM auxin  
871 plates). For lifespans, plates were supplemented with FUDR for a final concentration  
872 of 50 µM.

873

### 874 **Degron-tagged *daf-2* strain and tissue-specific TIR1 expression**

875 The sgRNA targeting the terminal exon of the annotated *daf-2* isoform a, 5'  
876 (G)TTTGGGGGTTTCAGACAAG 3' was cloned into the PU6:: sgRNA (F+E) plasmid  
877 backbone, pIK198 (Katic et al., 2015), yielding plasmid pIK323. The initial guanine was



878 added to aid transcription of the sgRNA. The underlined nucleotides in the sgRNA  
879 correspond to the stop codon of the DAF-2(A) protein.

880 The CRISPR tag repair template pIK325 degron::3xFLAG::SL2::SV40::NLS::degron  
881 ::wrmscarlet::egl-13 NLS was assembled using the SapTrap method (Schwartz and  
882 Jorgensen, 2016) from the following plasmids: pMLS257 (repair template only  
883 destination vector), pIK320 (wrmscarlet::syntron-embedded LoxP-flanked, reverse  
884 Cbr-unc-119), pMLS285 (egl-13 NLS N-tagging connector), pIK321 (linker::auxin  
885 degron::3XFLAG::SL2 operon::SV40 NLS::linker::auxin degron C-tagging connector)  
886 and phosphorylated pairs of hybridized oligonucleotides oIK1182  
887 5'TGGTCGGCTTTCGGTGAAAATGAGCATCTAATCGAGGATAATGAGCATCATCC  
888 ACTTGTC 3', oIK1183  
889 5'CGCGACAAGTGGATGATGCTCATTATCCTCGATTAGATGCTCATTTCACCGA  
890 AAGCCGA 3', and oIK1184  
891 5'ACGAACCCCCAAAAATCCCGCCTCTTAAATTATAAATTATCTCCCACATTATC  
892 ATATCT 3', oIK1185  
893 5'TACAGATATGATAATGTGGGAGATAATTTATAATTTAAGAGGCGGGATTTTTTG  
894 GGGGTT 3', respectively. Modules pIK320 and pIK321 (this study), compatible with  
895 the SapTrap kit, were assembled through a combination of synthetic DNA (Integrated  
896 DNA technologies) and molecular cloning methods. EG4322 *ttTi5605*; *unc-119(ed3)*  
897 animals were injected with a mix consisting of the sgRNA pIK323 at 65 ng/ml, tag repair  
898 template pIK325 at 50 ng/ml, pIK155 *Peft-3::Cas9::tbb-2* 3'UTR at 25 ng/ml and  
899 fluorescent markers pIK127 *Peft-3::GFP::h2b::tbb-2* 3'UTR at 20 ng/ml and *Pmyo-*  
900 *3::GFP* at 10 ng/ml. Among the non-Unc F2 progeny of the injected animals not labeled  
901 with green fluorescence were correctly tagged *daf-2(bch40)*

902 [degron::3xFLAG::SL2::SV40 NLS::degron ::wrmscarlet::egl-13 NLS]) animals. We  
903 were able to recover two independent CRISPR alleles *daf-2(bch39)* and *daf-2(bch40)*.  
904 pIK280 (TIR1::mRuby::tbb-2 in a MosSCI-compatible backbone) (Frøkjaer-Jensen et  
905 al., 2012; 2008) was created by Gibson assembly (Gibson et al., 2009) from templates  
906 including pLZ31 (Zhang et al., 2015). Promoter regions were inserted by Gibson  
907 assembly of PCR products into pIK280 to express TIR-1::mRuby in different tissues.  
908 Such plasmids were injected into EG4322 *ttTi5605; unc-119(ed3)* animals (Frøkjaer-  
909 Jensen et al., 2012). The strains are IFM160 *bchSi59* [*Pmyo-3::TIR1::mRuby::tbb-2*]  
910 II; *unc-119(ed3)*, IFM161 *bchSi60* [*Pvha-6::TIR1::mRuby::tbb-2*] II; *unc-119(ed3)*, and  
911 IFM164 *bchSi64* [*Prab-3::TIR1::mRuby::tbb-2*] II; *unc-119(ed3)*

912

### 913 **Western blot**

914 Synchronized *C. elegans* on their first day of adulthood were shifted to auxin plates for  
915 different time points. About 2'000-5'000 Adult *C. elegans* were disrupted using beads  
916 in lysis buffer (RIPA buffer (ThermoFisher #89900), 20 mM sodium fluoride (Sigma  
917 #67414), 2 mM sodium orthovanadate (Sigma #450243), and protease inhibitor  
918 (Roche #04693116001)) and kept on ice for 15 min before being centrifuged for 10 min  
919 at 15'000 x g. For equal loading, the protein concentration of the supernatant was  
920 determined with BioRad DC protein assay kit II (#5000116) and standard curve with  
921 Albumin (Pierce #23210). Samples were boiled at 37°C for 30 min, shortly spun down,  
922 and 40 µg of protein was loaded onto NuPAGE Bis-Tris 10% Protein Gels  
923 (ThermoFisher #NP0301BOX), and proteins were transferred to nitrocellulose  
924 membranes (Sigma #GE10600002). Western blot analysis was performed under  
925 standard conditions with antibodies against Tubulin (Sigma #T9026, 1:1000), (Sigma  
926 #F3165, 1:1000), FLAG-HRP (Sigma #A8592, 1:1000), and Degron (MBL #M214-3,

927 1:1000). HRP-conjugated goat anti-mouse (Cell Signaling #7076, 1:2000) secondary  
928 antibodies were used to detect the proteins by enhanced chemiluminescence (Bio-Rad  
929 #1705061). Quantification of protein levels was determined using ImageJ software and  
930 normalized to loading control (Tubulin). Statistical analysis was performed by using  
931 either a two-tailed or one-tailed *t*-test. All western blots and quantifications can be  
932 found in Data Source File 1 and 2.

933

### 934 **Reporter assays**

935 Transgenic *daf-16::gfp*; DAF-2::degron *C. elegans* were grown on plates for the  
936 indicated length of time supplemented with the corresponding concentration auxin at  
937 20°C. For image acquisition, the animals were placed on freshly made 2% agar pads  
938 and anesthetized with tetramisole (Teuscher and Ewald, 2018). Images were taken  
939 with an upright bright field fluorescence microscope (Tritech Research, model: BX-51-  
940 F) and a camera of the model [DFK 23UX236](#) (Teuscher and Ewald, 2018). For  
941 quantification, the animals were observed under a fluorescent stereomicroscope after  
942 the indicated amount of time has passed. *sod-3p::gfp* and *gst-4p::gfp* animals were  
943 incubated overnight at 20°C and quantified the next morning. L4 larvae were used for  
944 quantification. Statistical analysis was performed using the fisher's exact test for *daf-*  
945 *16::gfp* and *gst-4::gfp* and two-tailed *t*-test for *sod-3::gfp*. The DMSO control was  
946 compared to the ones treated with various concentrations of auxin.

947

### 948 **Developmental speed**

949 As described in (Ewald et al., 2012), L4 *C. elegans* of wild type N2 and DAF-2::degron  
950 were picked to plates at 15°C. After two days, the adult animals were shifted to new  
951 plates and were allowed to lay eggs for 2 hours. The stage of the offspring and their

952 health was assayed 4 days later at 20°C. Statistical analysis was performed by using  
953 a two-tailed *t*-test.

954

#### 955 **SDS dauer assay**

956 Synchronized L1 *C. elegans* were put on 1 mM auxin plates and incubated at 15°C,  
957 20°C, and 25°C, respectively. At the indicated time points, the animals were washed  
958 off with M9, shortly centrifuged down, and SDS was added for a final concentration of  
959 1%. After 10 minutes of gentle agitation, the animals were put on plates and checked  
960 for survival.

961

#### 962 **Dauer pharynx**

963 Adult *C. elegans* were placed on 1 mM auxin plates (for “DAF-2::degron”) or DMSO  
964 plates (for “DAF-2::degron”, *daf-2(e1368)* and *daf-2(e1370)*) and shifted to 25°C.  
965 Dauer-like offspring or a size-matching control was picked after 4 days, anesthetized  
966 in 10 mM sodium azide, and mounted on 2% agarose pads. Images were taken at 40X  
967 magnification using an inverted microscope (Tritech Research, MINJ-1000-CUST) and  
968 a camera of the model [DFK 23UX236](#).

969

#### 970 **Feeding of fluorescent beads**

971 Adult *C. elegans* were put on 1 mM auxin plates, or DMSO plate seeded with OP50  
972 containing a 1:100 dilution of red fluorescent latex bead solution (Sigma #L3280) and  
973 shifted to 25°C. Dauer offspring and control L2/L3 on the bacterial lawn were picked  
974 after 4 days, anesthetized in 10 mM sodium azide, and mounted on 2% agarose pads.  
975 An upright bright field fluorescence microscope (Tritech Research, model: BX-51-F)  
976 and a camera of the model DFK 23UX236 were used for image acquisition. The

977 presence of beads in the intestine was checked at 20X magnification. A two-tailed *t*-  
978 test was used for analysis.

979

### 980 **Dauer transition assay**

981 Bleached eggs were synchronized for two days at 20°C in M9 buffer supplemented  
982 with 5µg/ml cholesterol to yield a highly synchronous population. The larvae were put  
983 on OP50 and switched to plates containing 1 mM auxin at different time points. Dauer  
984 and non-dauer animals were counted after two days at 25°C or three days at 20°C.

985

### 986 **Germ cell count in L1**

987 Bleached eggs were synchronized for two days at 20°C in M9 buffer supplemented  
988 with 5µg/ml cholesterol to yield a highly synchronous population. The larvae were put  
989 on OP50 for 24 to 25 hours, washed off and anesthetized with 0.25 mM tetramisole,  
990 and mounted on 2% agarose pads. An upright bright field fluorescence microscope  
991 (Tritech Research, model: BX-51-F) was used to count the germ cells.

992

### 993 **Germline morphology and egg retention**

994 L4 *C. elegans* maintained at 15°C were picked on 1 mM auxin or control plates and  
995 shifted to the indicated temperatures. On the second day of adulthood, animals were  
996 mounted on 2% agar pads and anesthetized with 0.25 mM tetramisole. Images were  
997 taken at 40X magnification on an inverted microscope (Tritech Research, MINJ-1000-  
998 CUST) and a camera of the model [DFK 23UX236](#). Statistical analysis was performed  
999 using a two-tailed *t*-test for egg retention and fisher's exact test for germline  
1000 morphology.

1001

1002 **Body length measurement**

1003 L4 *C. elegans* maintained at 15°C were picked on 1 mM auxin or control plates and  
1004 shifted to the indicated temperatures. On the second day of adulthood, animals were  
1005 mounted on 2% agar pads and anesthetized with 0.25 mM tetramisole. Images were  
1006 taken at 10X magnification with a upright bright field fluorescence microscope (Tritech  
1007 Research, model: BX-51-F) and a camera of the model DFK 23UX236. Body lengths  
1008 were measured by placing a line through the middle of the body, starting from head to  
1009 tail, using ImageJ 1.51j. Statistical analysis was performed by using a two-tailed *t*-test.

1010

1011 **Progeny count**

1012 L4 *C. elegans* maintained at 15°C were picked on 1 mM auxin or control plates and  
1013 shifted to the indicated temperatures. *C. elegans* were shifted when necessary on fresh  
1014 plates, and the progeny was counted after two days of development. Animals that  
1015 crawled off the plate, dug into the agar, or bagged precociously were censored.  
1016 Statistical analysis was performed by using a two-tailed *t*-test.

1017

1018 **Lifespan assays**

1019 Synchronized L1 *C. elegans* were cultured at 15°C or 20°C on OP50 and shifted at the  
1020 L4 stage to NGM plates containing 50 μM FUDR and auxin or DMSO. Bursted, dried  
1021 out, or escaped animals were censored, and animals were considered dead when they  
1022 failed to respond to touch and did not show any pharyngeal pumping. For late-life auxin  
1023 lifespan assays. L4 *C. elegans* were picked onto NGM plates containing 50 μM FUDR.  
1024 At day 20 or 25 of adulthood, plates were top-coated either DMSO or auxin to reach a  
1025 final concentration of 0.25% DMSO or 1 mM auxin with 0.25% DMSO. Log-rank was

1026 used for statistical analysis. The plots were made by using the R-package survminer  
1027 or JMP 14.1. All statistics can be found in Supplementary Table 1.

1028

### 1029 **Arsenite assays**

1030 Oxidative stress assay was modified from (Ewald et al., 2017). *C. elegans* of the L1 or  
1031 L4 stage were shifted on auxin or DMSO plates washed off at the indicated time point,  
1032 incubated with 5 mM sodium arsenite in U-Shaped 96 well plates, and put into the  
1033 wMicroTracker (MTK100) for movement scoring. For statistical analysis, the area  
1034 under the curve was measured, and the mean for each run was calculated. Statistical  
1035 analysis was performed by using a paired sample *t*-test. All plots can be found in  
1036 Supplementary File 2

1037

1038



1039 **Author contributions**

1040 All authors participated in analyzing and interpreting the data. CYE and RV designed  
1041 the experiments. IK generated degron/FLAG tag into *daf-2* locus and generated TIR1  
1042 tissue-specific strains using CRISPR. TP crossed the DAF-2::degron strain and the  
1043 transgenes into DAF-2::degron strain. CYE performed late-in-life top-coating auxin  
1044 lifespans. RV performed all other assays. RV and CYE wrote the manuscript in  
1045 consultation with the other authors.

1046

1047 **Author Information**

1048 The authors have no competing interests to declare. Correspondence should be  
1049 addressed to C. Y. E.

1050

1051 **Acknowledgment**

1052 We thank Cyril Statzer for help with analysis of the lifespan and oxidative stress data,  
1053 Tea Kohlbrenner for help with crossings and taking the alae pictures, Joy Alcedo and  
1054 Ben Towbin for critical reading and feedback on the manuscript. Some strains were  
1055 provided by the CGC, which is funded by NIH Office of Research Infrastructure  
1056 Programs (P40 OD010440). RC was funded through an EMBO Installation Grant, the  
1057 TEAM/2016-2/11 programme of the Foundation for Polish Science co-financed by the  
1058 European Union under the European Regional Development Fund, and the Research  
1059 Council of Norway grant FRIMEDBIO-286499. CYE was funded by the Swiss National  
1060 Science Foundation grant PP00P3\_163898, and RV by the ETH Research Foundation  
1061 Grant ETH-30 16-2.

1062

## 1063 References

- 1064 Arantes-Oliveira, N., Berman, J.R., Kenyon, C.J., 2003. Healthy animals with  
1065 extreme longevity. *Science* 302, 611–611. doi:10.1126/science.1089169
- 1066 Beer, K.B., Fazeli, G., Judasova, K., Irmisch, L., Causemann, J., Mansfeld, J.,  
1067 Wehman, A.M., 2019. Degron-tagged reporters probe membrane topology and  
1068 enable the specific labelling of membrane-wrapped structures. *Nat Commun* 10,  
1069 3490. doi:10.1038/s41467-019-11442-z
- 1070 Blüher, M., Kahn, B.B., Kahn, C.R., 2003. Extended longevity in mice lacking the  
1071 insulin receptor in adipose tissue. *Science* 299, 572–574.  
1072 doi:10.1126/science.1078223
- 1073 Collins, J.J., Huang, C., Hughes, S., Kornfeld, K., 2008. The measurement and  
1074 analysis of age-related changes in *Caenorhabditis elegans*. *WormBook : the*  
1075 *online review of C elegans biology* 1–21. doi:10.1895/wormbook.1.137.1
- 1076 Dharmasiri, N., Dharmasiri, S., Estelle, M., 2005. The F-box protein TIR1 is an auxin  
1077 receptor. *Nature* 435, 441–445. doi:10.1038/nature03543
- 1078 Dillin, A., Crawford, D.K., Kenyon, C.J., 2002. Timing requirements for insulin/IGF-1  
1079 signaling in *C. elegans*. *Science* 298, 830–834. doi:10.1126/science.1074240
- 1080 Ewald, C.Y., Castillo-Quan, J.I., Blackwell, T.K., 2018. Untangling Longevity, Dauer,  
1081 and Healthspan in *Caenorhabditis elegans* Insulin/IGF-1-Signalling. *Gerontology*  
1082 64, 96–104. doi:10.1159/000480504
- 1083 Ewald, C.Y., Hourihan, J.M., Blackwell, T.K., 2017. Oxidative Stress Assays (arsenite  
1084 and tBHP) in *Caenorhabditis elegans*. *BIO-PROTOCOL* 7.  
1085 doi:10.21769/BioProtoc.2365
- 1086 Ewald, C.Y., Landis, J.N., Porter Abate, J., Murphy, C.T., Blackwell, T.K., 2015.  
1087 Dauer-independent insulin/IGF-1-signalling implicates collagen remodelling in  
1088 longevity. *Nature* 519, 97–101. doi:10.1038/nature14021
- 1089 Ewald, C.Y., Marfil, V., Li, C., 2016. Alzheimer-related protein APL-1 modulates  
1090 lifespan through heterochronic gene regulation in *Caenorhabditis elegans*. *Aging*  
1091 *Cell* 1–12. doi:10.1111/accel.12509
- 1092 Ewald, C.Y., Raps, D.A., Li, C., 2012. APL-1, the Alzheimer's Amyloid precursor  
1093 protein in *Caenorhabditis elegans*, modulates multiple metabolic pathways  
1094 throughout development. *Genetics* 191, 493–507.  
1095 doi:10.1534/genetics.112.138768
- 1096 Friedman, D.B., Johnson, T.E., 1988. A mutation in the *age-1* gene in *Caenorhabditis*  
1097 *elegans* lengthens life and reduces hermaphrodite fertility. *Genetics* 118, 75–86.
- 1098 Frøkjær-Jensen, C., Davis, M.W., Ailion, M., Jørgensen, E.M., 2012. Improved  
1099 Mos1-mediated transgenesis in *C. elegans*. *Nat Meth* 9, 117–118.  
1100 doi:10.1038/nmeth.1865
- 1101 Frøkjær-Jensen, C., Davis, M.W., Hopkins, C.E., Newman, B.J., Thummel, J.M.,  
1102 Olesen, S.-P., Grunnet, M., Jørgensen, E.M., 2008. Single-copy insertion of  
1103 transgenes in *Caenorhabditis elegans*. *Nat Genet* 40, 1375–1383.  
1104 doi:10.1038/ng.248
- 1105 Gems, D., Sutton, A.J., Sundermeyer, M.L., Albert, P.S., King, K.V., Edgley, M.L.,  
1106 Larsen, P.L., Riddle, D.L., 1998. Two pleiotropic classes of *daf-2* mutation affect  
1107 larval arrest, adult behavior, reproduction and longevity in *Caenorhabditis*  
1108 *elegans*. *Genetics* 150, 129–155.

- 1109 Gibson, D.G., Young, L., Chuang, R.-Y., Venter, J.C., Hutchison, C.A., Smith, H.O.,  
1110 2009. Enzymatic assembly of DNA molecules up to several hundred kilobases.  
1111 Nat Meth 6, 343–345. doi:10.1038/nmeth.1318
- 1112 Han, S., Schroeder, E.A., Silva-García, C.G., Hebestreit, K., Mair, W.B., Brunet, A.,  
1113 2017. Mono-unsaturated fatty acids link H3K4me3 modifiers to *C. elegans*  
1114 lifespan. Nature 544, 185–190. doi:10.1038/nature21686
- 1115 Henderson, S.T., Johnson, T.E., 2001. *daf-16* integrates developmental and  
1116 environmental inputs to mediate aging in the nematode *Caenorhabditis elegans*.  
1117 CURBIO 11, 1975–1980.
- 1118 Hobert, O., 2019. Plasticity of the Electrical Connectome of *C. elegans*. Cell 176,  
1119 1174–1189.e16. doi:10.1016/j.cell.2018.12.024
- 1120 Holzenberger, M., Dupont, J., Ducos, B., Leneuve, P., Géloën, A., Even, P.C.,  
1121 Cervera, P., Le Bouc, Y., 2003. IGF-1 receptor regulates lifespan and resistance  
1122 to oxidative stress in mice. Nature 421, 182–187. doi:10.1038/nature01298
- 1123 Hu, P.J., 2007. Dauer. WormBook : the online review of *C. elegans* biology 1–19.  
1124 doi:10.1895/wormbook.1.144.1
- 1125 Kappeler, L., De Magalhaes Filho, C., Dupont, J., Leneuve, P., Cervera, P., Périn, L.,  
1126 Loudes, C., Blaise, A., Klein, R., Epelbaum, J., Le Bouc, Y., Holzenberger, M.,  
1127 2008. Brain IGF-1 receptors control mammalian growth and lifespan through a  
1128 neuroendocrine mechanism. PLoS Biol 6, e254.  
1129 doi:10.1371/journal.pbio.0060254
- 1130 Karp, X., 2018. Working with dauer larvae. WormBook : the online review of *C*  
1131 *elegans* biology 2018, 1–19. doi:10.1895/wormbook.1.180.1
- 1132 Katic, I., Xu, L., Ciosk, R., 2015. CRISPR/Cas9 Genome Editing in *Caenorhabditis*  
1133 *elegans*: Evaluation of Templates for Homology-Mediated Repair and Knock-Ins  
1134 by Homology-Independent DNA Repair. G3 (Bethesda) 5, 1649–1656.  
1135 doi:10.1534/g3.115.019273
- 1136 Kennedy, B.K., Berger, S.L., Brunet, A., Campisi, J., Cuervo, A.M., Epel, E.S.,  
1137 Franceschi, C., Lithgow, G.J., Morimoto, R.I., Pessin, J.E., Rando, T.A.,  
1138 Richardson, A., Schadt, E.E., Wyss-Coray, T., Sierra, F., 2014. Geroscience:  
1139 linking aging to chronic disease. Cell 159, 709–713.  
1140 doi:10.1016/j.cell.2014.10.039
- 1141 Kennedy, S., Wang, D., Ruvkun, G., 2004. A conserved siRNA-degrading RNase  
1142 negatively regulates RNA interference in *C. elegans*. Nature 427, 645–649.  
1143 doi:10.1038/nature02302
- 1144 Kenyon, C.J., 2010. The genetics of ageing. Nature 464, 504–512.  
1145 doi:10.1038/nature08980
- 1146 Kenyon, C.J., Chang, J., Gensch, E., Rudner, A., Tabtiang, R., 1993. A *C. elegans*  
1147 mutant that lives twice as long as wild type. Nature 366, 461–464.  
1148 doi:10.1038/366461a0
- 1149 Kimura, K.D., Riddle, D.L., 2011. The *C. elegans* DAF-2 insulin-like receptor is  
1150 abundantly expressed in the nervous system and regulated by nutritional status.  
1151 Cold Spring Harb Symp Quant Biol 76, 113–120.  
1152 doi:10.1101/sqb.2011.76.010660
- 1153 Kimura, K.D., Tissenbaum, H.A., Liu, Y., Ruvkun, G., 1997. *daf-2*, an insulin  
1154 receptor-like gene that regulates longevity and diapause in *Caenorhabditis*  
1155 *elegans*. Science 277, 942–946.
- 1156 KOOPMANS, S.J., MAASSEN, J.A., Sips, H.C., RADDER, J.K., Krans, H.M., 1995.  
1157 Tissue-related changes in insulin receptor number and autophosphorylation

- 1158 induced by starvation and diabetes in rats. *Metab. Clin. Exp.* 44, 291–297.  
1159 doi:10.1016/0026-0495(95)90157-4
- 1160 Li, W.-D., Xia, J.-R., Lian, Y.-S., 2019. MiR-15b can target insulin receptor to regulate  
1161 hepatic insulin signaling in mice. *Anim Cells Syst (Seoul)* 23, 82–89.  
1162 doi:10.1080/19768354.2019.1583125
- 1163 Lin, K., Hsin, H., Libina, N., Kenyon, C.J., 2001. Regulation of the *Caenorhabditis*  
1164 *elegans* longevity protein DAF-16 by insulin/IGF-1 and germline signaling. *Nat*  
1165 *Genet* 28, 139–145. doi:10.1038/88850
- 1166 Liu, G.Y., Liu, G.Y., Sabatini, D.M., 2020. mTOR at the nexus of nutrition, growth,  
1167 ageing and disease. *Nat Rev Mol Cell Biol* 21, 183–203. doi:10.1038/s41580-  
1168 019-0199-y
- 1169 Lopez, A.L., Chen, J., Joo, H.-J., Drake, M., Shidate, M., Kseib, C., Arur, S., 2013.  
1170 DAF-2 and ERK couple nutrient availability to meiotic progression during  
1171 *Caenorhabditis elegans* oogenesis. *Dev Cell* 27, 227–240.  
1172 doi:10.1016/j.devcel.2013.09.008
- 1173 López-Otín, C., Blasco, M.A., Partridge, L., Serrano, M., Kroemer, G., 2013. The  
1174 hallmarks of aging. *Cell* 153, 1194–1217. doi:10.1016/j.cell.2013.05.039
- 1175 Maier, B., Gluba, W., Bernier, B., Turner, T., Mohammad, K., Guise, T., Sutherland,  
1176 A., Thorner, M., Scrable, H., 2004. Modulation of mammalian life span by the  
1177 short isoform of p53. *Genes & Development* 18, 306–319.  
1178 doi:10.1101/gad.1162404
- 1179 Malone, E.A., Thomas, J.H., 1994. A screen for nonconditional dauer-constitutive  
1180 mutations in *Caenorhabditis elegans*. *Genetics* 136, 879–886.
- 1181 Mao, K., Quipildor, G.F., Tabrizian, T., Novaj, A., Guan, F., Walters, R.O., Delahaye,  
1182 F., Hubbard, G.B., Ikeno, Y., Ejima, K., Li, P., Allison, D.B., Salimi-Moosavi, H.,  
1183 Beltran, P.J., Cohen, P., Barzilai, N., Huffman, D.M., 2018. Late-life targeting of  
1184 the IGF-1 receptor improves healthspan and lifespan in female mice. *Nat*  
1185 *Commun* 9, 2394. doi:10.1038/s41467-018-04805-5
- 1186 McCulloch, D., Gems, D., 2003. Body size, insulin/IGF signaling and aging in the  
1187 nematode *Caenorhabditis elegans*. *Exp Gerontol* 38, 129–136.
- 1188 Murphy, C.T., 2013. Insulin/insulin-like growth factor signaling in *C. elegans*.  
1189 *Wormbook* 1–43. doi:10.1895/wormbook.1.164.1
- 1190 Nagarajan, A., Petersen, M.C., Nasiri, A.R., Butrico, G., Fung, A., Ruan, H.-B.,  
1191 Kursawe, R., Caprio, S., Thibodeau, J., Bourgeois-Daigneault, M.-C., Sun, L.,  
1192 Gao, G., Bhanot, S., Jurczak, M.J., Green, M.R., Shulman, G.I., Wajapeyee, N.,  
1193 2016. MARCH1 regulates insulin sensitivity by controlling cell surface insulin  
1194 receptor levels. *Nat Commun* 7, 12639. doi:10.1038/ncomms12639
- 1195 Ogg, S., Paradis, S., Patterson, G.I., Ruvkun, G., 1997. The Fork head transcription  
1196 factor DAF-16 transduces insulin-like metabolic and longevity signals in *C.*  
1197 *elegans*. *Nature* 389, 994–999. doi:10.1038/40194
- 1198 Partridge, L., Deelen, J., Slagboom, P.E., 2018. Facing up to the global challenges of  
1199 ageing. *Nature* 561, 45–56. doi:10.1038/s41586-018-0457-8
- 1200 Patel, D.S., Garza-Garcia, A., Nanji, M., McElwee, J.J., Ackerman, D., Driscoll, P.C.,  
1201 Gems, D., 2008. Clustering of genetically defined allele classes in the  
1202 *Caenorhabditis elegans* DAF-2 insulin/IGF-1 receptor. *Genetics* 178, 931–946.  
1203 doi:10.1534/genetics.107.070813
- 1204 Pierce, S.B., Costa, M., Wisotzkey, R., Devadhar, S., Homburger, S.A., Buchman,  
1205 A.R., Ferguson, K.C., Heller, J., Platt, D.M., Pasquinelli, A.A., Liu, L.X.,  
1206 Doberstein, S.K., Ruvkun, G., 2001. Regulation of DAF-2 receptor signaling by

- 1207 human insulin and *ins-1*, a member of the unusually large and diverse *C. elegans*  
1208 insulin gene family. *Genes & Development* 15, 672–686. doi:10.1101/gad.867301  
1209 Ruaud, A.-F., Katic, I., Bessereau, J.-L., 2011. Insulin/Insulin-like growth factor  
1210 signaling controls non-Dauer developmental speed in the nematode  
1211 *Caenorhabditis elegans*. *Genetics* 187, 337–343.  
1212 doi:10.1534/genetics.110.123323  
1213 Schwartz, M.L., Jorgensen, E.M., 2016. SapTrap, a Toolkit for High-Throughput  
1214 CRISPR/Cas9 Gene Modification in *Caenorhabditis elegans*. *Genetics* 202,  
1215 1277–1288. doi:10.1534/genetics.115.184275  
1216 Smith, E.D., Kaeberlein, T.L., Lydum, B.T., Sager, J., Welton, K.L., Kennedy, B.K.,  
1217 Kaeberlein, M., 2008. Age- and calorie-independent life span extension from  
1218 dietary restriction by bacterial deprivation in *Caenorhabditis elegans*. *BMC Dev*  
1219 *Biol* 8, 49–13. doi:10.1186/1471-213X-8-49  
1220 Song, R., Peng, W., Zhang, Y., Lv, F., Wu, H.-K., Guo, J., Cao, Y., Pi, Y., Zhang, X.,  
1221 Jin, L., Zhang, M., Jiang, P., Liu, F., Meng, S., Zhang, X., Jiang, P., Cao, C.-M.,  
1222 Xiao, R.-P., 2013. Central role of E3 ubiquitin ligase MG53 in insulin resistance  
1223 and metabolic disorders. *Nature* 494, 375–379. doi:10.1038/nature11834  
1224 Suh, Y., Atzmon, G., Cho, M.-O., Hwang, D., Liu, B., Leahy, D.J., Barzilai, N., Cohen,  
1225 P., 2008. Functionally significant insulin-like growth factor I receptor mutations in  
1226 centenarians. *Proceedings of the National Academy of Sciences* 105, 3438–  
1227 3442. doi:10.1073/pnas.0705467105  
1228 Swanson, M.M., Riddle, D.L., 1981. Critical periods in the development of the  
1229 *Caenorhabditis elegans* dauer larva. *Developmental Biology* 84, 27–40.  
1230 doi:10.1016/0012-1606(81)90367-5  
1231 Tawo, R., Pokrzywa, W., Kevei, É., Akyuz, M.E., Balaji, V., Adrian, S., Höhfeld, J.,  
1232 Hoppe, T., 2017. The Ubiquitin Ligase CHIP Integrates Proteostasis and Aging  
1233 by Regulation of Insulin Receptor Turnover. *Cell* 169, 470–482.e13.  
1234 doi:10.1016/j.cell.2017.04.003  
1235 Teuscher, A.C., Ewald, C.Y., 2018. Overcoming Autofluorescence to Assess GFP  
1236 Expression During Normal Physiology and Aging in *Caenorhabditis elegans*. *BIO-*  
1237 *PROTOCOL* 8. doi:10.21769/BioProtoc.2940  
1238 Tullet, J.M.A., Hertweck, M., An, J.H., Baker, J., Hwang, J.Y., Liu, S., Oliveira, R.P.,  
1239 Baumeister, R., Blackwell, T.K., 2008. Direct inhibition of the longevity-promoting  
1240 factor SKN-1 by insulin-like signaling in *C. elegans*. *Cell* 132, 1025–1038.  
1241 doi:10.1016/j.cell.2008.01.030  
1242 Wolkow, C.A., Kimura, K.D., Lee, M.S., Ruvkun, G., 2000. Regulation of *C. elegans*  
1243 life-span by insulinlike signaling in the nervous system. *Science* 290, 147–150.  
1244 doi:10.1126/science.290.5489.147  
1245 Xu, J., Gontier, G., Chaker, Z., Lacube, P., Dupont, J., Holzenberger, M., 2014.  
1246 Longevity effect of IGF-1R(+/-) mutation depends on genetic background-specific  
1247 receptor activation. *Aging Cell* 13, 19–28. doi:10.1111/accel.12145  
1248 Zhang, L., Ward, J.D., Cheng, Z., Dernburg, A.F., 2015. The auxin-inducible  
1249 degradation (AID) system enables versatile conditional protein depletion in *C.*  
1250 *elegans*. *Development* 142, 4374–4384. doi:10.1242/dev.129635  
1251
